# Supplementary material for: Spirocyclic rhodamine B benzoisothiazole derivative: a multi-stimuli fluorescent switch manifesting ethanol-responsiveness, photo responsiveness, and acidochromism
Source: Royal Society of Chemistry journal article supplement (doi:10.1039/d2ra08022b), 2023-01-01
Supplement: d2ra08022b1.pdf [file d2ra08022b1.pdf]

## Electronic Supplementary Information

# Spirocyclic rhodamine B benzoisothiazole derivative: A multi-stimuli fluorescent switch manifesting ethanol-responsiveness, photo responsiveness, and acidochromism

Himabindu Battula <sup>a</sup>, Moromi Nath <sup>b</sup>, Sabyashachi Mishra <sup>b</sup>, Subbalakshmi Jayanty <sup>a\*</sup>

<sup>a</sup> Department of Chemistry, Birla Institute of Technology and Science, Pilani-Hyderabad Campus, Jawaharnagar, Shameerpet, Kapra Mandal, Medchal Dist. Hyderabad - 500078, Telangana State, India.,

<sup>b</sup> Department of Chemistry, Indian Institute of Technology, Kharagpur-721302, India.,

Correspondence e-mail: [jslakshmi@hyderabad.bits-pilani.ac.in](mailto:jslakshmi@hyderabad.bits-pilani.ac.in)

| Contents                                                                                                                                                                                                                                 | Page no. |
|------------------------------------------------------------------------------------------------------------------------------------------------------------------------------------------------------------------------------------------|----------|
| <b>Fig. S1-Fig. S2</b> Mass and HRMS spectrum of <b>RHBIT</b> -----                                                                                                                                                                      | S2, S3   |
| <b>Fig. S3</b> FT-IR spectrum of <b>RHBIT</b> along with RHB & ANB -----                                                                                                                                                                 | S3       |
| <b>Fig. S4-Fig. S5</b> <sup>1</sup> H NMR, and <sup>13</sup> C NMR of <b>RHBIT</b> -----                                                                                                                                                 | S4, S5   |
| <b>Table S1</b> Crystal data and refinement parameters of <b>RHBIT</b> -----                                                                                                                                                             | S6       |
| <b>Table S2(a)-S7(c)</b> Detailed crystallographic tables including fractional atomic coordinates, anisotropic displacement parameters, bond lengths, bond angles, hydrogen atom coordinates and isotropic displacement parameters ----- | S6-S18   |
| <b>Fig. S6a-Fig. S6e</b> Asymmetric unit of <b>RHBIT</b> , angle between the planes, parallel arrangement of two units along <i>oa</i> axis. -----                                                                                       | S19, S20 |
| <b>Fig. S7</b> Effect of pH on emission response of <b>RHBIT</b> -----                                                                                                                                                                   | S20      |
| <b>Fig. S8</b> Variation in emission intensity after UV irradiation in EtOH, DMSO, CHCl <sub>3</sub> , and DCM at different intervals of time -----                                                                                      | S21      |
| <b>Fig. S9</b> Comparative <sup>1</sup> H NMR spectra of <b>RHBIT</b> before and after UV light irradiation -----                                                                                                                        | S21      |
| <b>Fig. S10a-Fig. S10e</b> Absorption and optical bandgap spectra of <b>RHBIT</b> in the solid before and after UV exposure and photographic images of the solid under UV and ambient light -----                                        | S22      |
| <b>Table S8</b> Lifetime decay, quantum yield, radiative and non-radiative decay values of <b>RHBIT</b> before and after UV illumination in different solvents -----                                                                     | S23      |
| <b>References</b> -----                                                                                                                                                                                                                  | S23      |
| <b>Fig. S11</b> Fluorescence decay curves before and after UV exposure in different solvents -----                                                                                                                                       | S24      |
| <b>Fig. S12a-Fig. S12e</b> Absorption and emission spectra of <b>RHBIT</b> with different acids and their photographic images of the solutions under UV and visible light. -----                                                         | S25      |
| <b>Fig. S13</b> Experimental proof by FTIR spectra of <b>RHBIT</b> after sensing with PTSA and its crystal image -----                                                                                                                   | S25      |
| <b>Fig. S14</b> TGA and DSC analysis for <b>RHBIT</b> -----                                                                                                                                                                              | S26      |
| <b>Fig. S15</b> SEM images of <b>RHBIT</b> in different solvents -----                                                                                                                                                                   | S26      |

For **RHBIT** ESI-MS  $m/z^+$  calculated for  $C_{35}H_{33}N_5O_4S$ : 619.23, found ( $[M+H]^+$ ) 620

MassPeaks:5

RawMode:Averaged 0.38-0.76(131-261) BasePeak:620.2500(11109778)

BG Mode:Averaged 0.01-0.36(3-125) Segment 1 - Event 1

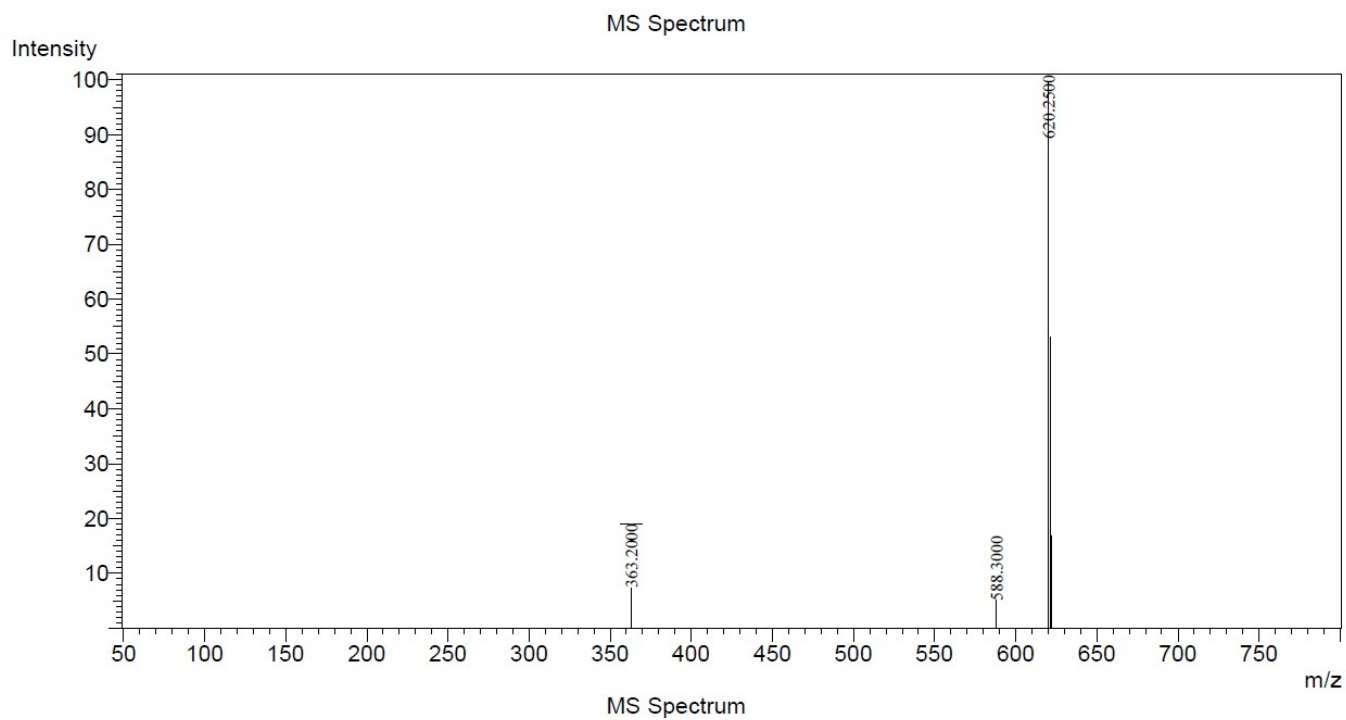

**Fig. S1** Mass spectrum of **RHBIT**.

.GB-BIT #13-31 RT: 0.10-0.24 AV: 19 NL: 1.53E6  
: FTMS (1,1) + p APCI corona Full ms [90.00-1800.00]

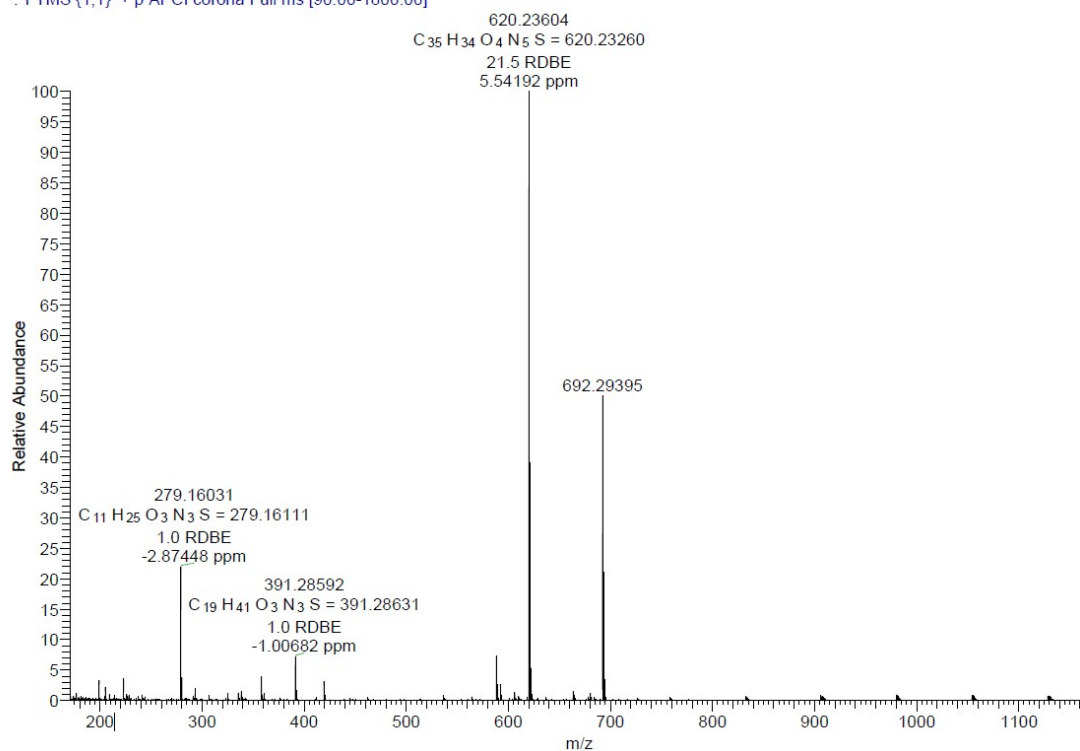

**Fig. S2** HRMS spectrum for **RHBIT** HRMS (EI): calcd for C<sub>35</sub>H<sub>33</sub>N<sub>5</sub>O<sub>4</sub>S [M+H]<sup>+</sup> m/z, 619.23; found m/z, 620.

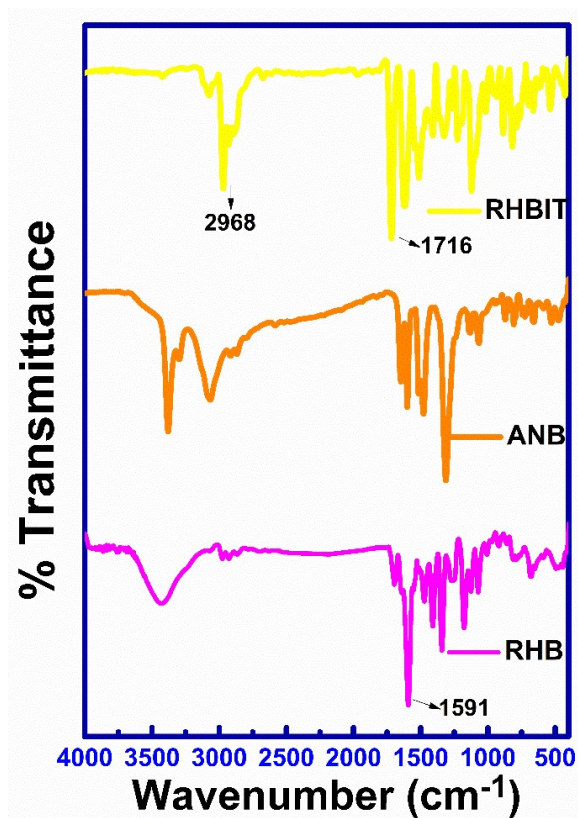

**Fig. S3** Comparative FT-IR spectrum of RHB, ANB, and **RHBIT**, depicting the change in the frequency of carbonyl group on transformation from acid (1591  $\text{cm}^{-1}$ ) to cyclic amide (1716  $\text{cm}^{-1}$ ) functionality.

$^1\text{H}$ NMR and  $^{13}\text{C}$  NMR spectra of **RHBIT**:

$^1\text{H}$  NMR (400 MHz,  $\text{CDCl}_3$ )  $\delta$  8.55 (d, 1H,  $J = 1.9$  Hz, Ar-H), 8.03 – 8.00 (dd, 1H, Ar-H), 7.97 (dd, 1H,  $J = 9.7, 2.3$  Hz, Ar-H), 7.55 – 7.47 (m, 3H, Ar-H), 7.15 (dd, 1H,  $J = 6.4, 1.3$  Hz, Ar-H), 6.60 (d, 2H,  $J = 8.9$  Hz, Ar-H), 6.28 (d, 2H,  $J = 2.5$  Hz, Ar-H), 6.22 (dd, 2H,  $J = 8.9, 2.6$  Hz, Ar-H), 3.24 (q, 8H,  $J = 7.2$  Hz,  $-\text{CH}_2$ ), 1.06 (t, 12H,  $J = 7.1$  Hz,  $-\text{CH}_3$ ).

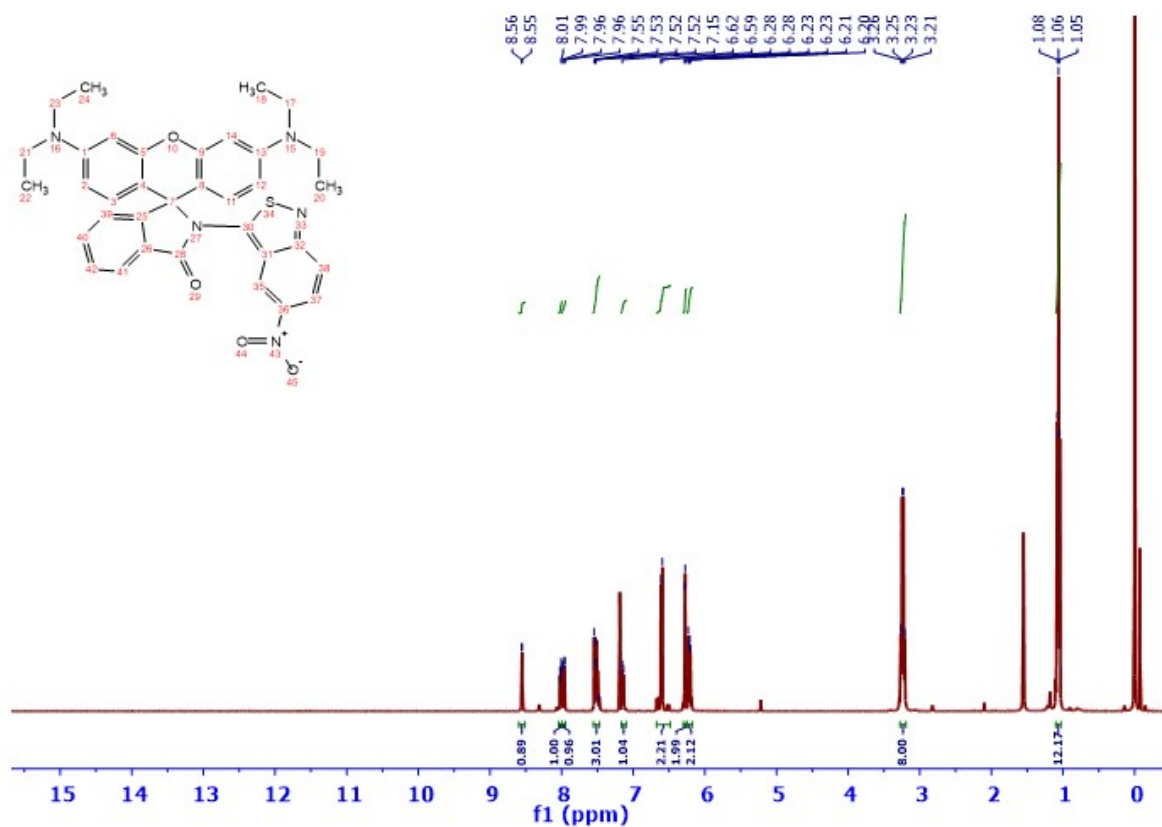

**Fig. S4**  $^1\text{H}$  NMR spectrum of **RHBIT** in  $\text{CDCl}_3$ :

$^{13}\text{C}$  NMR (101 MHz,  $\text{CDCl}_3$ )  $\delta$  164.6, 162.1, 158.9, 152.6, 152.4, 148.5, 142.3, 133.4, 127.8, 127.2, 123.3, 123.1, 121.5, 120.8, 120.3, 107.5, 102.6, 97.0, 68.4, 43.3, 11.4

| Identification code | RHBIT                                                           |
|---------------------|-----------------------------------------------------------------|
| Empirical formula   | C <sub>35</sub> H <sub>33</sub> N <sub>5</sub> O <sub>4</sub> S |
| Formula weight      | 619.72                                                          |
| Temperature/K       | 100                                                             |
| Crystal system      | monoclinic                                                      |
| Space group         | P2 <sub>1</sub>                                                 |
| a/Å, b/Å, c/Å       | 10.65490(10); 24.1161(3); 12.8100(2)                            |
| α/°, β/°, γ/°       | 90, 111.908(2), 90                                              |

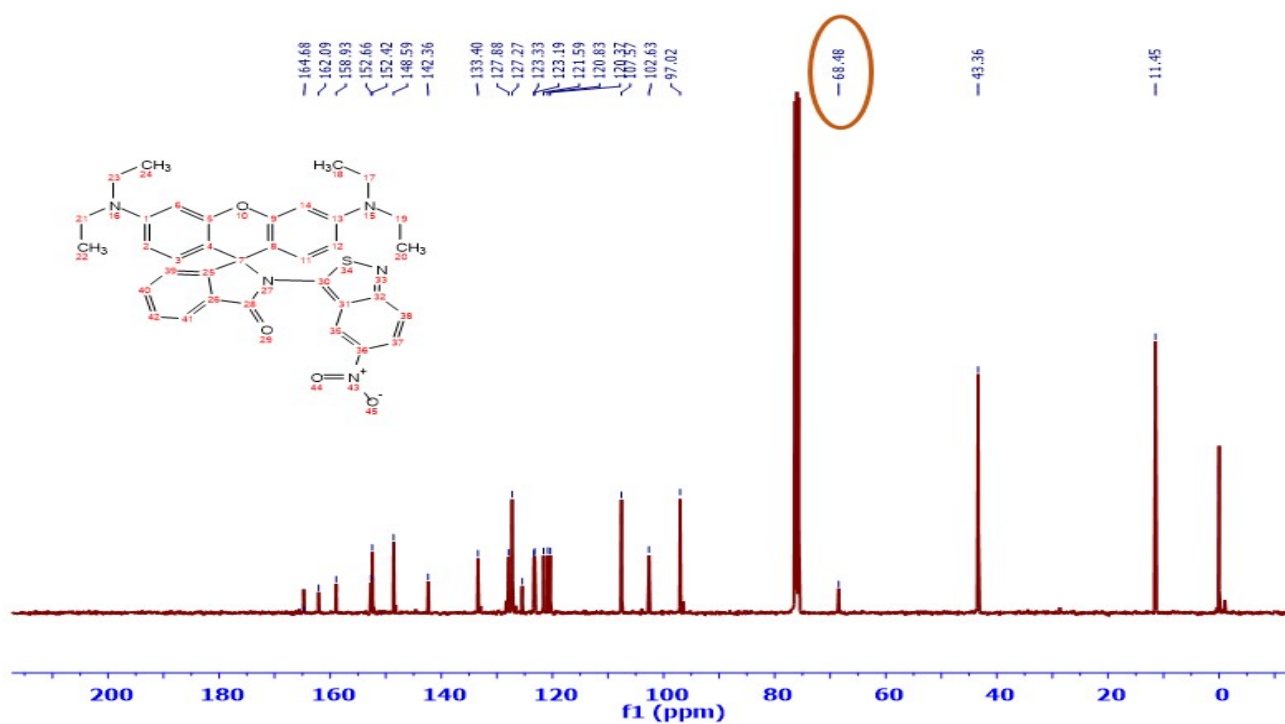

**Fig. S5** <sup>13</sup>C NMR spectrum of **RHBIT** in CDCl<sub>3</sub>

**Table S1** Crystal data and refinement parameters for **RHBIT**.

|                                           |                                                               |
|-------------------------------------------|---------------------------------------------------------------|
| Volume/Å <sup>3</sup>                     | 3053.88(8)                                                    |
| Z                                         | 4                                                             |
| $\rho_{\text{calc}}/\text{g}/\text{cm}^3$ | 1.348                                                         |
| $\mu/\text{mm}^{-1}$                      | 1.339                                                         |
| F(000)                                    | 1304.0                                                        |
| Crystal size/mm <sup>3</sup>              | 0.2 × 0.1 × 0.05                                              |
| Radiation                                 | Cu K $\alpha$ ( $\lambda = 1.54184$ )                         |
| 2 $\Theta$ range for data collection/°    | 7.438 to 159.564                                              |
| Index ranges                              | -13 ≤ h ≤ 13; -30 ≤ k ≤ 30; -15 ≤ l ≤ 10                      |
| Reflections collected                     | 37072                                                         |
| Independent reflections                   | 12789[R <sub>int</sub> = 0.0451; R <sub>sigma</sub> = 0.0451] |
| Data/restraints/parameters                | 12789/1/819                                                   |
| Goodness-of-fit on F <sup>2</sup>         | 1.038                                                         |
| Final R indexes [I ≥ 2 $\sigma$ (I)]      | R <sub>1</sub> = 0.0513, wR <sub>2</sub> = 0.1403             |
| Final R indexes [all data]                | R <sub>1</sub> = 0.0553, wR <sub>2</sub> = 0.1437             |
| CCDC                                      | 2202193                                                       |

**Table S2 (a)** Fractional Atomic Coordinates ( $\times 10^4$ ) and Equivalent Isotropic Displacement Parameters ( $\text{\AA}^2 \times 10^3$ ) for **RHBIT**.  $U_{\text{eq}}$  is defined as 1/3 of the trace of the orthogonalized  $U_{ij}$  tensor.

| Atom | x          | y          | z          | $U_{\text{eq}}$ |
|------|------------|------------|------------|-----------------|
| S1   | 5912.1(10) | 4955.3(4)  | 10689.2(8) | 33.6(2)         |
| O1   | 3001(3)    | 5254.5(10) | 11468(2)   | 30.9(6)         |
| O2   | 4620(3)    | 5634.7(12) | 7200(2)    | 31.3(6)         |
| O3   | 9727(3)    | 6817.9(16) | 8731(4)    | 54.7(9)         |
| O4   | 7625(3)    | 6801.7(13) | 7629(3)    | 41.2(7)         |
| N1   | 2505(3)    | 3312.7(13) | 10934(3)   | 30.0(7)         |

|     |           |            |           |          |
|-----|-----------|------------|-----------|----------|
| N2  | 3018(4)   | 7165.2(14) | 12325(3)  | 40.4(9)  |
| N3  | 4223(3)   | 5508.2(13) | 8850(2)   | 23.3(6)  |
| N4  | 7547(3)   | 5064.0(17) | 11214(3)  | 38.4(8)  |
| N5  | 8568(4)   | 6642.6(14) | 8470(3)   | 34.7(7)  |
| C1  | 2895(4)   | 4823.1(15) | 10745(3)  | 26.0(7)  |
| C2  | 2732(4)   | 4309.1(15) | 11157(3)  | 27.1(7)  |
| C3  | 2644(4)   | 3825.4(15) | 10524(3)  | 26.2(7)  |
| C4  | 2738(4)   | 3890.1(15) | 9458(3)   | 28.0(7)  |
| C5  | 2868(4)   | 4408.4(15) | 9061(3)   | 27.0(7)  |
| C6  | 2945(3)   | 4894.1(15) | 9682(3)   | 24.9(7)  |
| C7  | 3026(4)   | 5456.9(14) | 9204(3)   | 23.9(7)  |
| C8  | 3055(4)   | 5905.9(15) | 10039(3)  | 25.2(7)  |
| C9  | 3035(4)   | 6468.5(16) | 9771(3)   | 30.8(8)  |
| C10 | 3020(4)   | 6884.4(16) | 10501(3)  | 32.7(8)  |
| C11 | 3042(4)   | 6757.4(16) | 11588(3)  | 30.5(8)  |
| C12 | 3077(4)   | 6192.7(15) | 11864(3)  | 28.6(7)  |
| C13 | 3063(4)   | 5787.9(14) | 11101(3)  | 26.0(7)  |
| C14 | 2363(4)   | 2813.7(16) | 10261(4)  | 34.4(8)  |
| C15 | 941(5)    | 2706(2)    | 9413(4)   | 44.8(10) |
| C16 | 2296(4)   | 3262.6(16) | 11998(3)  | 34.5(8)  |
| C17 | 891(5)    | 3402(2)    | 11937(5)  | 52.6(12) |
| C18 | 2966(5)   | 7749.4(16) | 12021(4)  | 37.4(9)  |
| C19 | 4340(5)   | 7978.5(19) | 12152(5)  | 47.2(11) |
| C20 | 2956(6)   | 7027.1(19) | 13415(4)  | 43.9(11) |
| C21 | 1537(6)   | 6861(2)    | 13323(5)  | 53.4(12) |
| C22 | 1886(4)   | 5544.0(14) | 8078(3)   | 25.6(7)  |
| C23 | 502(4)    | 5561.3(17) | 7843(4)   | 35.3(9)  |
| C24 | -355(5)   | 5630.1(19) | 6731(4)   | 44.2(11) |
| C25 | 138(5)    | 5674(2)    | 5869(4)   | 45.4(11) |
| C26 | 1508(4)   | 5658.9(17) | 6102(3)   | 34.7(8)  |
| C27 | 2366(4)   | 5598.1(15) | 7222(3)   | 28.4(7)  |
| C28 | 3851(4)   | 5580.9(14) | 7694(3)   | 25.8(7)  |
| C29 | 5537(4)   | 5411.5(15) | 9592(3)   | 25.5(7)  |
| C30 | 6756(4)   | 5653.5(16) | 9630(3)   | 27.4(7)  |
| C31 | 7002(4)   | 6063.3(15) | 8935(3)   | 27.8(7)  |
| C32 | 8310(4)   | 6228.8(16) | 9198(4)   | 30.9(8)  |
| C33 | 9420(4)   | 6024.0(19) | 10125(4)  | 36.4(9)  |
| C34 | 9215(4)   | 5630(2)    | 10803(4)  | 38.7(9)  |
| C35 | 7867(4)   | 5431.8(18) | 10571(4)  | 32.8(8)  |
| S2  | 3036.7(9) | 5087.2(4)  | 3940.2(8) | 33.2(2)  |
| O5  | 6271(3)   | 4698.3(11) | 3228(2)   | 32.4(6)  |
| O6  | 4330(3)   | 4409.0(12) | 7396(2)   | 32.5(6)  |
| O7  | 1405(4)   | 3111.4(14) | 6805(3)   | 46.3(8)  |
| O8  | -708(4)   | 3113.4(17) | 5708(4)   | 65.5(12) |
| N6  | 5708(4)   | 2796.2(15) | 2261(3)   | 35.4(7)  |
| N7  | 7044(5)   | 6625.9(15) | 3781(3)   | 46.3(10) |
| N8  | 4750(3)   | 4516.3(12) | 5754(2)   | 23.2(6)  |

|     |         |            |         |         |
|-----|---------|------------|---------|---------|
| N9  | 1402(4) | 4968.3(16) | 3413(3) | 36.4(7) |
| N10 | 457(4)  | 3288.5(15) | 5991(4) | 41.8(9) |
| C36 | 5996(4) | 4183.1(16) | 3540(3) | 27.0(7) |
| C37 | 5963(4) | 3765.9(16) | 2786(3) | 29.7(8) |
| C38 | 5754(4) | 3211.8(16) | 3006(3) | 30.9(8) |
| C40 | 5605(4) | 3528.9(16) | 4755(4) | 33.2(8) |
| C41 | 5815(4) | 4081.3(15) | 4541(3) | 25.8(7) |
| C42 | 5925(4) | 4536.1(15) | 5378(3) | 25.9(7) |
| C43 | 6069(3) | 5097.7(15) | 4900(3) | 25.4(7) |
| C44 | 6072(4) | 5591.7(16) | 5468(3) | 29.0(7) |

**Table S2 (b)** Fractional Atomic Coordinates ( $\times 10^4$ ) and Equivalent Isotropic Displacement Parameters ( $\text{\AA}^2 \times 10^3$ ) for **RHBIT**.  $U_{\text{eq}}$  is defined as 1/3 of the trace of the orthogonalised  $U_{ij}$  tensor

|     |         |            |         |          |
|-----|---------|------------|---------|----------|
| C45 | 6335(4) | 6097.7(16) | 5095(3) | 29.6(8)  |
| C46 | 6657(4) | 6136.4(16) | 4120(3) | 31.9(8)  |
| C47 | 6595(4) | 5642.2(17) | 3522(3) | 32.8(8)  |
| C48 | 6298(4) | 5143.7(16) | 3904(3) | 27.7(7)  |
| C49 | 5725(6) | 2217.1(19) | 2586(4) | 49.3(12) |
| C50 | 7076(8) | 2026(2)    | 3411(5) | 73(2)    |
| C51 | 5967(4) | 2929.0(19) | 1242(4) | 36.8(9)  |
| C52 | 7447(5) | 3031(3)    | 1423(5) | 55.3(14) |
| C53 | 7186(5) | 7132.4(17) | 4427(4) | 44.1(10) |
| C54 | 8547(6) | 7179(2)    | 5378(5) | 55.0(13) |
| C55 | 7728(6) | 6617(2)    | 2916(4) | 51.7(12) |
| C56 | 6726(6) | 6673(3)    | 1765(5) | 60.0(13) |
| C57 | 7065(4) | 4428.6(15) | 6503(3) | 28.7(8)  |
| C58 | 8431(4) | 4361.4(18) | 6711(4) | 36.3(9)  |
| C59 | 9293(5) | 4267(2)    | 7816(5) | 48.8(12) |
| C60 | 8828(5) | 4245(2)    | 8685(4) | 46.7(11) |
| C61 | 7446(5) | 4311.0(18) | 8482(4) | 39.0(9)  |
| C62 | 6595(4) | 4395.5(15) | 7360(3) | 30.7(8)  |
| C63 | 5109(4) | 4442.7(15) | 6901(3) | 27.5(7)  |
| C64 | 3426(4) | 4611.2(16) | 5000(3) | 26.0(7)  |
| C65 | 2232(4) | 4348.3(15) | 4945(3) | 27.0(7)  |
| C66 | 2007(4) | 3915.5(16) | 5598(3) | 29.9(8)  |
| C67 | 709(4)  | 3735.2(17) | 5315(4) | 33.3(8)  |
| C68 | -419(4) | 3958.6(19) | 4410(4) | 38.0(9)  |
| C69 | -224(4) | 4375.2(19) | 3778(4) | 36.3(9)  |
| C70 | 1108(4) | 4579.8(17) | 4015(3) | 31.8(8)  |
| C39 | 5576(5) | 3103.7(17) | 4029(4) | 35.8(9)  |

**Table S3 (a)** Anisotropic Displacement Parameters ( $\text{\AA}^2 \times 10^3$ ) for **RHBIT**. The Anisotropic displacement factor exponent takes the form:  $-2\pi^2[h^2a^*2U_{11}+2hka^*b^*U_{12}+\dots]$ .

| Atom | $U_{11}$ | $U_{22}$ | $U_{33}$ | $U_{23}$ | $U_{13}$ | $U_{12}$ |
|------|----------|----------|----------|----------|----------|----------|
|------|----------|----------|----------|----------|----------|----------|



| Atom | U <sub>11</sub> | U <sub>22</sub> | U <sub>33</sub> | U <sub>23</sub> | U <sub>13</sub> | U <sub>12</sub> |
|------|-----------------|-----------------|-----------------|-----------------|-----------------|-----------------|
| S1   | 29.6(4)         | 41.0(5)         | 29.9(4)         | 11.0(4)         | 10.8(4)         | 1.5(4)          |
| O1   | 51.9(16)        | 18.7(12)        | 28.2(13)        | 1.4(9)          | 22.1(12)        | -1.8(11)        |
| O2   | 38.6(15)        | 33.2(14)        | 26.6(13)        | 0.8(10)         | 17.5(12)        | -2.7(11)        |
| O3   | 38.6(18)        | 52(2)           | 80(3)           | 4.3(18)         | 29.0(18)        | -11.3(15)       |
| O4   | 45.8(17)        | 37.6(16)        | 43.5(17)        | 3.4(13)         | 20.5(14)        | -6.0(13)        |
| N1   | 34.9(16)        | 22.5(14)        | 35.9(17)        | 2.5(12)         | 16.9(14)        | -1.8(12)        |
| N2   | 68(3)           | 21.8(15)        | 35.1(18)        | -3.6(13)        | 23.9(18)        | -0.5(15)        |
| N3   | 22.6(14)        | 27.8(15)        | 21.6(14)        | 0.3(11)         | 10.6(11)        | -0.9(11)        |
| N4   | 30.2(16)        | 50(2)           | 33.0(17)        | 8.9(16)         | 10.1(14)        | 4.6(15)         |
| N5   | 35.7(17)        | 29.6(16)        | 47(2)           | -5.5(14)        | 25.4(16)        | -5.9(13)        |
| C1   | 25.8(17)        | 23.7(17)        | 30.3(18)        | -1.1(13)        | 12.6(14)        | -1.2(13)        |
| C2   | 29.9(17)        | 23.7(17)        | 30.4(18)        | 1.0(13)         | 14.3(14)        | -2.6(13)        |
| C3   | 23.8(16)        | 22.5(16)        | 32.8(19)        | 2.0(14)         | 11.2(14)        | 1.6(12)         |
| C4   | 29.2(18)        | 24.7(17)        | 34(2)           | 0.0(14)         | 16.7(15)        | -1.2(14)        |
| C5   | 26.9(17)        | 25.9(17)        | 30.3(18)        | -2.3(14)        | 13.2(14)        | -0.3(13)        |
| C6   | 21.0(15)        | 25.5(17)        | 29.2(17)        | 1.8(14)         | 10.5(13)        | -1.5(12)        |
| C7   | 23.8(16)        | 23.8(16)        | 26.6(17)        | 1.8(13)         | 12.4(14)        | -0.3(12)        |
| C8   | 27.8(17)        | 22.9(16)        | 25.9(17)        | 0.6(13)         | 11.3(14)        | -1.9(13)        |
| C9   | 41(2)           | 23.1(17)        | 31.0(19)        | -0.1(14)        | 15.8(16)        | -1.1(14)        |
| C10  | 44(2)           | 25.2(18)        | 31.1(19)        | 1.9(14)         | 15.9(16)        | -0.1(15)        |
| C11  | 36.3(19)        | 23.9(17)        | 32.9(19)        | -2.8(14)        | 14.7(16)        | -1.6(14)        |
| C12  | 37(2)           | 23.3(17)        | 28.5(18)        | 0.2(14)         | 15.8(15)        | -2.5(14)        |
| C13  | 29.1(17)        | 21.9(17)        | 29.2(18)        | 2.4(13)         | 13.3(15)        | -0.4(13)        |
| C14  | 38(2)           | 23.1(17)        | 44(2)           | 2.3(16)         | 17.7(18)        | -0.6(15)        |

**Table S3 (b)** Anisotropic Displacement Parameters ( $\text{\AA}^2 \times 10^3$ ) for **RHBIT**. The Anisotropic displacement factor exponent takes the form:  $-2\pi^2[h^2a^2U_{11}+2hka^*b^*U_{12}+\dots]$ .

| Atom | U <sub>11</sub> | U <sub>22</sub> | U <sub>33</sub> | U <sub>23</sub> | U <sub>13</sub> | U <sub>12</sub> |
|------|-----------------|-----------------|-----------------|-----------------|-----------------|-----------------|
| C15  | 42(2)           | 41(2)           | 47(3)           | -1.8(19)        | 12(2)           | -8.0(19)        |
| C16  | 46(2)           | 25.6(17)        | 37(2)           | 6.2(15)         | 20.7(18)        | -1.2(15)        |
| C17  | 50(3)           | 55(3)           | 66(3)           | -6(2)           | 37(3)           | -13(2)          |
| C18  | 49(2)           | 23.2(18)        | 41(2)           | -2.1(16)        | 18.0(18)        | 4.6(16)         |
| C19  | 45(2)           | 32(2)           | 60(3)           | -11.4(19)       | 15(2)           | -2.2(18)        |
| C20  | 68(3)           | 34(2)           | 31(2)           | -8.1(16)        | 21(2)           | 1(2)            |
| C21  | 66(3)           | 53(3)           | 48(3)           | -8(2)           | 29(2)           | 7(2)            |
| C22  | 26.2(17)        | 20.2(15)        | 28.2(18)        | -0.2(13)        | 7.8(14)         | -0.1(12)        |
| C23  | 28.6(19)        | 31.5(19)        | 45(2)           | -0.4(16)        | 12.8(17)        | 0.0(15)         |
| C24  | 30(2)           | 37(2)           | 55(3)           | 4.8(19)         | 3.0(19)         | 1.1(17)         |
| C25  | 43(2)           | 36(2)           | 40(2)           | 2.0(18)         | -4.0(19)        | -1.3(18)        |
| C26  | 40(2)           | 29.8(19)        | 26.7(19)        | 2.3(15)         | 4.2(16)         | -0.5(16)        |
| C27  | 31.7(18)        | 24.3(17)        | 28.0(18)        | 1.2(13)         | 9.8(15)         | -0.8(14)        |
| C28  | 36.2(19)        | 21.0(16)        | 21.0(16)        | 1.9(12)         | 11.6(14)        | -0.5(13)        |

|     |          |          |          |          |          |           |
|-----|----------|----------|----------|----------|----------|-----------|
| C29 | 24.2(17) | 26.0(17) | 28.5(17) | 0.7(13)  | 12.1(14) | 0.8(13)   |
| C30 | 24.6(17) | 30.2(18) | 30.0(18) | -3.8(15) | 13.2(14) | 0.8(14)   |
| C31 | 28.9(17) | 24.3(17) | 32.9(19) | -4.2(14) | 14.5(15) | -2.6(13)  |
| C32 | 31.6(19) | 28.9(18) | 38(2)    | -3.9(15) | 19.2(16) | -2.2(14)  |
| C33 | 26.2(18) | 43(2)    | 42(2)    | -5.4(18) | 15.5(17) | -1.6(16)  |
| C34 | 27.0(19) | 52(3)    | 35(2)    | 1.6(18)  | 8.6(16)  | 0.8(17)   |
| C35 | 27.6(19) | 41(2)    | 32(2)    | -0.5(16) | 12.9(15) | 0.8(16)   |
| S2  | 30.5(4)  | 38.6(5)  | 30.7(4)  | 10.7(4)  | 11.5(4)  | 1.1(4)    |
| O5  | 47.9(16) | 24.1(13) | 32.4(14) | -1.9(10) | 23.4(12) | -5.4(11)  |
| O6  | 43.1(15) | 31.7(14) | 31.3(14) | 3.7(11)  | 23.8(12) | 1.7(11)   |
| O7  | 57(2)    | 36.0(16) | 52(2)    | 6.6(14)  | 28.3(17) | -3.1(14)  |
| O8  | 42.8(19) | 53(2)    | 105(3)   | 17(2)    | 33(2)    | -13.0(16) |
| N6  | 38.0(18) | 28.8(16) | 37.7(18) | -8.2(14) | 12.1(15) | 0.5(13)   |
| N7  | 77(3)    | 26.1(17) | 42(2)    | -1.7(14) | 30(2)    | -13.2(17) |
| N8  | 25.4(14) | 26.3(14) | 20.6(14) | 1.5(11)  | 11.6(11) | -0.5(11)  |
| N9  | 31.9(16) | 44.0(19) | 33.3(17) | 6.7(15)  | 12.1(13) | 2.8(15)   |
| N10 | 44(2)    | 30.8(17) | 59(2)    | -0.8(16) | 28.9(19) | -2.8(15)  |
| C36 | 25.8(16) | 26.3(17) | 31.6(19) | 1.0(14)  | 13.7(14) | -0.9(13)  |
| C37 | 30.0(18) | 28.9(18) | 31.8(19) | -1.5(15) | 13.1(15) | 0.3(14)   |
| C38 | 30.3(18) | 28.5(18) | 33(2)    | -4.1(15) | 10.7(15) | 1.4(14)   |
| C40 | 43(2)    | 26.4(18) | 32(2)    | 1.1(15)  | 15.9(17) | -0.7(15)  |
| C41 | 25.8(16) | 24.4(17) | 29.0(18) | -1.1(13) | 12.2(14) | 0.8(13)   |
| C42 | 24.4(16) | 26.1(17) | 29.4(18) | -0.3(14) | 12.7(14) | -2.2(13)  |
| C43 | 23.6(16) | 25.0(17) | 29.0(17) | 0.7(14)  | 11.4(13) | 0.6(13)   |
| C44 | 31.4(18) | 26.6(18) | 32.6(19) | 0.5(14)  | 16.2(15) | -0.7(14)  |
| C45 | 33.6(19) | 23.8(17) | 32.3(19) | -0.8(14) | 13.3(16) | 0.0(14)   |
| C46 | 38(2)    | 25.9(17) | 31.6(19) | 4.5(14)  | 13.4(16) | -3.4(15)  |

**Table S3 (c)** Anisotropic Displacement Parameters ( $\text{\AA}^2 \times 10^3$ ) for **RHBIT**. The Anisotropic displacement factor exponent takes the form:  $-2\pi^2[h^2a^{*2}U_{11}+2hka^*b^*U_{12}+\dots]$ .

|     |          |          |          |           |          |          |
|-----|----------|----------|----------|-----------|----------|----------|
| C47 | 42(2)    | 29.5(19) | 31.3(19) | -2.0(15)  | 19.0(17) | -4.8(16) |
| C48 | 33.1(17) | 25.3(16) | 26.9(17) | -2.6(13)  | 13.9(14) | -1.2(14) |
| C49 | 65(3)    | 30(2)    | 46(3)    | -10.6(18) | 13(2)    | -3(2)    |
| C50 | 98(5)    | 40(3)    | 61(3)    | -9(2)     | 5(3)     | 24(3)    |
| C51 | 34(2)    | 40(2)    | 39(2)    | -13.6(17) | 16.9(17) | -2.7(16) |
| C52 | 44(3)    | 59(3)    | 68(3)    | -27(3)    | 26(2)    | -9(2)    |
| C53 | 64(3)    | 23.6(19) | 50(3)    | 0.9(17)   | 28(2)    | -4.6(18) |
| C54 | 74(4)    | 46(3)    | 48(3)    | -8(2)     | 27(3)    | -17(2)   |
| C55 | 61(3)    | 35(2)    | 55(3)    | 4(2)      | 17(2)    | -11(2)   |
| C56 | 71(4)    | 50(3)    | 64(3)    | 3(3)      | 30(3)    | 0(3)     |
| C57 | 28.7(18) | 23.1(17) | 30.9(19) | -0.5(14)  | 7.1(15)  | -2.3(14) |
| C58 | 28.4(19) | 35(2)    | 43(2)    | 0.9(17)   | 10.0(17) | 0.2(15)  |
| C59 | 32(2)    | 43(3)    | 55(3)    | 9(2)      | -3(2)    | 1.2(18)  |

|     |          |          |          |          |          |          |
|-----|----------|----------|----------|----------|----------|----------|
| C60 | 43(2)    | 39(2)    | 41(2)    | 6.8(18)  | -4(2)    | -3.0(19) |
| C61 | 46(2)    | 32(2)    | 29(2)    | 0.6(15)  | 2.3(18)  | -0.7(17) |
| C62 | 36(2)    | 23.5(17) | 29.9(19) | 0.4(14)  | 9.3(16)  | 0.8(14)  |
| C63 | 34.3(19) | 22.0(16) | 25.7(17) | 0.7(13)  | 10.7(14) | 0.0(13)  |
| C64 | 27.0(17) | 27.3(17) | 26.3(17) | 0.9(13)  | 12.9(14) | 0.1(14)  |
| C65 | 26.9(17) | 26.8(17) | 28.3(18) | -0.4(14) | 11.6(14) | 1.4(13)  |
| C66 | 31.0(19) | 26.7(18) | 35(2)    | 0.0(14)  | 15.3(16) | 1.2(14)  |
| C67 | 32.0(19) | 29.5(19) | 43(2)    | -3.1(16) | 19.7(17) | -3.7(15) |
| C68 | 29.5(19) | 40(2)    | 49(3)    | -4.1(18) | 19.2(18) | -2.2(16) |
| C69 | 25.2(18) | 43(2)    | 40(2)    | 3.0(17)  | 11.7(16) | 5.2(16)  |
| C70 | 30.9(19) | 33.4(19) | 31.3(19) | 0.1(15)  | 11.8(15) | 3.1(15)  |
| C39 | 46(2)    | 24.2(17) | 36(2)    | -0.3(15) | 14.3(18) | -2.4(16) |

**Table S4 (a) Bond Lengths for RHBIT**

| Atom | Atom | Length/Å | Atom | Atom | Length/Å |
|------|------|----------|------|------|----------|
| S1   | N4   | 1.637(4) | S2   | N9   | 1.641(4) |
| S1   | C29  | 1.711(4) | S2   | C64  | 1.707(4) |
| O1   | C1   | 1.370(4) | O5   | C36  | 1.370(4) |
| O1   | C13  | 1.380(4) | O5   | C48  | 1.373(4) |
| O2   | C28  | 1.214(5) | O6   | C63  | 1.221(5) |
| O3   | N5   | 1.227(5) | O7   | N10  | 1.226(5) |
| O4   | N5   | 1.229(5) | O8   | N10  | 1.230(5) |
| N1   | C3   | 1.373(5) | N6   | C38  | 1.372(5) |
| N1   | C14  | 1.455(5) | N6   | C49  | 1.455(6) |
| N1   | C16  | 1.466(5) | N6   | C51  | 1.467(6) |
| N2   | C11  | 1.370(5) | N7   | C46  | 1.373(5) |
| N2   | C18  | 1.457(5) | N7   | C53  | 1.451(6) |

**Table S4 (b) Bond Lengths for RHBIT**

|    |     |          |     |     |          |
|----|-----|----------|-----|-----|----------|
| N2 | C20 | 1.460(6) | N7  | C55 | 1.536(7) |
| N3 | C7  | 1.510(4) | N8  | C42 | 1.501(4) |
| N3 | C28 | 1.395(5) | N8  | C63 | 1.384(5) |
| N3 | C29 | 1.387(5) | N8  | C64 | 1.400(5) |
| N4 | C35 | 1.338(6) | N9  | C70 | 1.323(5) |
| N5 | C32 | 1.460(5) | N10 | C67 | 1.469(6) |
| C1 | C2  | 1.383(5) | C36 | C37 | 1.386(5) |
| C1 | C6  | 1.392(5) | C36 | C41 | 1.387(5) |
| C2 | C3  | 1.403(5) | C37 | C38 | 1.400(6) |
| C3 | C4  | 1.415(5) | C38 | C39 | 1.418(6) |
| C4 | C5  | 1.376(5) | C40 | C41 | 1.395(5) |

|     |     |           |     |     |           |
|-----|-----|-----------|-----|-----|-----------|
| C5  | C6  | 1.401 (5) | C40 | C39 | 1.376 (6) |
| C6  | C7  | 1.505 (5) | C41 | C42 | 1.508 (5) |
| C7  | C8  | 1.513 (5) | C42 | C43 | 1.517 (5) |
| C7  | C22 | 1.515 (5) | C42 | C57 | 1.521 (5) |
| C8  | C9  | 1.397 (5) | C43 | C44 | 1.395 (5) |
| C8  | C13 | 1.388 (5) | C43 | C48 | 1.390 (5) |
| C9  | C10 | 1.376 (5) | C44 | C45 | 1.377 (5) |
| C10 | C11 | 1.417 (6) | C45 | C46 | 1.417 (6) |
| C11 | C12 | 1.404 (5) | C46 | C47 | 1.405 (5) |
| C12 | C13 | 1.377 (5) | C47 | C48 | 1.379 (5) |
| C14 | C15 | 1.521 (6) | C49 | C50 | 1.506 (8) |
| C16 | C17 | 1.507 (6) | C51 | C52 | 1.525 (6) |
| C18 | C19 | 1.514 (7) | C53 | C54 | 1.511 (8) |
| C20 | C21 | 1.526 (8) | C55 | C56 | 1.469 (8) |
| C22 | C23 | 1.392 (5) | C57 | C58 | 1.388 (6) |
| C22 | C27 | 1.378 (5) | C57 | C62 | 1.369 (6) |
| C23 | C24 | 1.386 (7) | C58 | C59 | 1.389 (7) |
| C24 | C25 | 1.392 (8) | C59 | C60 | 1.378 (8) |
| C25 | C26 | 1.377 (7) | C60 | C61 | 1.405 (7) |
| C26 | C27 | 1.391 (5) | C61 | C62 | 1.399 (6) |
| C27 | C28 | 1.468 (5) | C62 | C63 | 1.473 (6) |
| C29 | C30 | 1.408 (5) | C64 | C65 | 1.399 (5) |
| C30 | C31 | 1.418 (5) | C65 | C66 | 1.413 (5) |
| C30 | C35 | 1.440 (6) | C65 | C70 | 1.449 (5) |
| C31 | C32 | 1.366 (5) | C66 | C67 | 1.364 (6) |
| C32 | C33 | 1.416 (6) | C67 | C68 | 1.427 (6) |
| C33 | C34 | 1.358 (7) | C68 | C69 | 1.354 (6) |
| C34 | C35 | 1.436 (6) | C69 | C70 | 1.424 (6) |

**Table S5 (a) Bond Angles for RHBIT**

| Atom | Atom | Atom | Angle/°   | Atom | Atom | Atom | Angle/°   |
|------|------|------|-----------|------|------|------|-----------|
| N4   | S1   | C29  | 96.95(18) | N9   | S2   | C64  | 96.61(18) |
| C1   | O1   | C13  | 118.7(3)  | C36  | O5   | C48  | 118.8(3)  |
| C3   | N1   | C14  | 121.4(3)  | C38  | N6   | C49  | 120.6(4)  |
| C3   | N1   | C16  | 120.4(3)  | C38  | N6   | C51  | 119.3(4)  |
| C14  | N1   | C16  | 117.7(3)  | C49  | N6   | C51  | 118.5(4)  |
| C11  | N2   | C18  | 121.2(4)  | C46  | N7   | C53  | 121.5(4)  |
| C11  | N2   | C20  | 120.9(3)  | C46  | N7   | C55  | 119.6(4)  |
| C18  | N2   | C20  | 117.7(3)  | C53  | N7   | C55  | 116.5(4)  |
| C28  | N3   | C7   | 113.1(3)  | C63  | N8   | C42  | 114.3(3)  |
| C29  | N3   | C7   | 122.0(3)  | C63  | N8   | C64  | 124.2(3)  |
| C29  | N3   | C28  | 124.3(3)  | C64  | N8   | C42  | 121.3(3)  |
| C35  | N4   | S1   | 109.3(3)  | C70  | N9   | S2   | 109.3(3)  |
| O3   | N5   | O4   | 122.8(4)  | O7   | N10  | O8   | 123.5(4)  |
| O3   | N5   | C32  | 118.1(4)  | O7   | N10  | C67  | 118.9(4)  |
| O4   | N5   | C32  | 119.1(3)  | O8   | N10  | C67  | 117.7(4)  |

| Atom | Atom | Atom | Angle/°  | Atom | Atom | Atom | Angle/°  |
|------|------|------|----------|------|------|------|----------|
| O1   | C1   | C2   | 114.4(3) | O5   | C36  | C37  | 114.1(3) |
| O1   | C1   | C6   | 123.0(3) | O5   | C36  | C41  | 123.3(3) |
| C2   | C1   | C6   | 122.6(3) | C37  | C36  | C41  | 122.6(3) |
| C1   | C2   | C3   | 121.0(3) | C36  | C37  | C38  | 121.2(4) |
| N1   | C3   | C2   | 121.4(3) | N6   | C38  | C37  | 121.7(4) |
| N1   | C3   | C4   | 121.7(3) | N6   | C38  | C39  | 121.8(4) |
| C2   | C3   | C4   | 116.9(3) | C37  | C38  | C39  | 116.6(4) |
| C5   | C4   | C3   | 120.7(3) | C39  | C40  | C41  | 122.9(4) |
| C4   | C5   | C6   | 122.8(4) | C36  | C41  | C40  | 116.0(3) |
| C1   | C6   | C5   | 115.9(3) | C36  | C41  | C42  | 121.9(3) |
| C1   | C6   | C7   | 122.5(3) | C40  | C41  | C42  | 122.0(3) |
| C5   | C6   | C7   | 121.5(3) | N8   | C42  | C41  | 110.7(3) |
| N3   | C7   | C8   | 110.9(3) | N8   | C42  | C43  | 112.4(3) |
| N3   | C7   | C22  | 99.7(3)  | N8   | C42  | C57  | 99.1(3)  |
| C6   | C7   | N3   | 112.3(3) | C41  | C42  | C43  | 110.8(3) |
| C6   | C7   | C8   | 110.3(3) | C41  | C42  | C57  | 111.9(3) |
| C6   | C7   | C22  | 111.4(3) | C43  | C42  | C57  | 111.6(3) |
| C8   | C7   | C22  | 111.8(3) | C44  | C43  | C42  | 122.2(3) |
| C9   | C8   | C7   | 121.8(3) | C48  | C43  | C42  | 121.4(3) |
| C13  | C8   | C7   | 122.5(3) | C48  | C43  | C44  | 116.3(3) |
| C13  | C8   | C9   | 115.7(3) | C45  | C44  | C43  | 122.5(4) |
| C10  | C9   | C8   | 123.0(4) | C44  | C45  | C46  | 120.8(4) |
| C9   | C10  | C11  | 120.7(4) | N7   | C46  | C45  | 122.4(4) |
| N2   | C11  | C10  | 121.6(4) | N7   | C46  | C47  | 121.0(4) |
| N2   | C11  | C12  | 121.9(4) | C47  | C46  | C45  | 116.6(3) |
| C12  | C11  | C10  | 116.5(3) | C48  | C47  | C46  | 121.1(4) |
| C13  | C12  | C11  | 121.2(4) | O5   | C48  | C43  | 123.2(3) |
| O1   | C13  | C8   | 122.8(3) | O5   | C48  | C47  | 114.3(3) |
| C12  | C13  | O1   | 114.1(3) | C47  | C48  | C43  | 122.5(3) |

**Table S5 (b) Bond Angles for RHBIT**

|     |     |     |          |     |     |     |          |
|-----|-----|-----|----------|-----|-----|-----|----------|
| C12 | C13 | C8  | 123.0(3) | N6  | C49 | C50 | 113.7(5) |
| N1  | C14 | C15 | 114.9(4) | N6  | C51 | C52 | 115.3(4) |
| N1  | C16 | C17 | 115.2(4) | N7  | C53 | C54 | 112.8(4) |
| N2  | C18 | C19 | 112.6(4) | C56 | C55 | N7  | 111.1(5) |
| N2  | C20 | C21 | 112.5(4) | C58 | C57 | C42 | 127.7(4) |
| C23 | C22 | C7  | 128.2(4) | C62 | C57 | C42 | 111.6(3) |
| C27 | C22 | C7  | 111.6(3) | C62 | C57 | C58 | 120.7(4) |
| C27 | C22 | C23 | 120.3(4) | C57 | C58 | C59 | 117.5(4) |
| C24 | C23 | C22 | 117.6(4) | C60 | C59 | C58 | 122.0(5) |
| C23 | C24 | C25 | 121.7(4) | C59 | C60 | C61 | 120.9(4) |
| C26 | C25 | C24 | 120.6(4) | C62 | C61 | C60 | 116.1(4) |
| C25 | C26 | C27 | 117.5(4) | C57 | C62 | C61 | 122.8(4) |
| C22 | C27 | C26 | 122.2(4) | C57 | C62 | C63 | 109.6(3) |
| C22 | C27 | C28 | 109.4(3) | C61 | C62 | C63 | 127.6(4) |
| C26 | C27 | C28 | 128.3(4) | O6  | C63 | N8  | 126.0(4) |
| O2  | C28 | N3  | 125.9(4) | O6  | C63 | C62 | 128.7(3) |
| O2  | C28 | C27 | 128.0(3) | N8  | C63 | C62 | 105.3(3) |

|     |     |     |          |     |     |     |          |
|-----|-----|-----|----------|-----|-----|-----|----------|
| N3  | C28 | C27 | 106.1(3) | N8  | C64 | S2  | 122.8(3) |
| N3  | C29 | S1  | 122.5(3) | C65 | C64 | S2  | 108.6(3) |
| N3  | C29 | C30 | 129.5(3) | C65 | C64 | N8  | 128.6(3) |
| C30 | C29 | S1  | 108.0(3) | C64 | C65 | C66 | 131.0(4) |
| C29 | C30 | C31 | 130.6(4) | C64 | C65 | C70 | 108.9(3) |
| C29 | C30 | C35 | 109.5(3) | C66 | C65 | C70 | 120.0(3) |
| C31 | C30 | C35 | 119.8(3) | C67 | C66 | C65 | 117.2(4) |
| C32 | C31 | C30 | 117.4(4) | C66 | C67 | N10 | 117.9(4) |
| C31 | C32 | N5  | 117.4(4) | C66 | C67 | C68 | 123.9(4) |
| C31 | C32 | C33 | 124.1(4) | C68 | C67 | N10 | 118.2(4) |
| C33 | C32 | N5  | 118.5(4) | C69 | C68 | C67 | 119.7(4) |
| C34 | C33 | C32 | 119.8(4) | C68 | C69 | C70 | 119.5(4) |
| C33 | C34 | C35 | 119.2(4) | N9  | C70 | C65 | 116.7(4) |
| N4  | C35 | C30 | 116.2(4) | N9  | C70 | C69 | 123.7(4) |
| N4  | C35 | C34 | 124.0(4) | C69 | C70 | C65 | 119.6(4) |
| C34 | C35 | C30 | 119.7(4) | C40 | C39 | C38 | 120.7(4) |

**Table S6 (a) Torsion Angles for RHBIT**

| <b>A</b> | <b>B</b> | <b>C</b> | <b>D</b> | <b>Angle/°</b> | <b>A</b> | <b>B</b> | <b>C</b> | <b>D</b> | <b>Angle/°</b> |
|----------|----------|----------|----------|----------------|----------|----------|----------|----------|----------------|
| S1       | N4       | C35      | C30      | 1.9(5)         | S2       | N9       | C70      | C65      | -1.1(5)        |
| S1       | N4       | C35      | C34      | 178.6(4)       | S2       | N9       | C70      | C69      | -179.5(3)      |
| S1       | C29      | C30      | C31      | -178.3(3)      | S2       | C64      | C65      | C66      | 177.7(4)       |
| S1       | C29      | C30      | C35      | -0.1(4)        | S2       | C64      | C65      | C70      | -0.4(4)        |
| O1       | C1       | C2       | C3       | -178.3(3)      | O5       | C36      | C37      | C38      | 177.2(3)       |
| O1       | C1       | C6       | C5       | 177.9(3)       | O5       | C36      | C41      | C40      | -177.0(4)      |
| O1       | C1       | C6       | C7       | -4.3(5)        | O5       | C36      | C41      | C42      | -0.6(6)        |
| O3       | N5       | C32      | C31      | 176.0(4)       | O7       | N10      | C67      | C66      | 2.9(6)         |
| O3       | N5       | C32      | C33      | -4.0(6)        | O7       | N10      | C67      | C68      | -176.5(4)      |
| O4       | N5       | C32      | C31      | -3.8(5)        | O8       | N10      | C67      | C66      | -177.4(4)      |
| O4       | N5       | C32      | C33      | 176.2(4)       | O8       | N10      | C67      | C68      | 3.2(6)         |
| N1       | C3       | C4       | C5       | 179.5(3)       | N6       | C38      | C39      | C40      | -179.0(4)      |
| N2       | C11      | C12      | C13      | 178.1(4)       | N7       | C46      | C47      | C48      | 175.5(4)       |
| N3       | C7       | C8       | C9       | 59.5(4)        | N8       | C42      | C43      | C44      | 50.0(4)        |
| N3       | C7       | C8       | C13      | -122.5(4)      | N8       | C42      | C43      | C48      | -134.4(3)      |
| N3       | C7       | C22      | C23      | -177.9(4)      | N8       | C42      | C57      | C58      | 175.6(4)       |
| N3       | C7       | C22      | C27      | 3.5(4)         | N8       | C42      | C57      | C62      | -3.7(4)        |
| N3       | C29      | C30      | C31      | 0.3(7)         | N8       | C64      | C65      | C66      | -1.2(7)        |
| N3       | C29      | C30      | C35      | 178.5(4)       | N8       | C64      | C65      | C70      | -179.3(4)      |
| N4       | S1       | C29      | N3       | -177.7(3)      | N9       | S2       | C64      | N8       | 178.8(3)       |
| N4       | S1       | C29      | C30      | 1.0(3)         | N9       | S2       | C64      | C65      | -0.1(3)        |
| N5       | C32      | C33      | C34      | -178.6(4)      | N10      | C67      | C68      | C69      | 179.2(4)       |
| C1       | O1       | C13      | C8       | -1.6(5)        | C36      | O5       | C48      | C43      | 0.6(5)         |
| C1       | O1       | C13      | C12      | 175.9(3)       | C36      | O5       | C48      | C47      | 179.5(3)       |
| C1       | C2       | C3       | N1       | 178.9(3)       | C36      | C37      | C38      | N6       | 179.4(4)       |
| C1       | C2       | C3       | C4       | 0.4(5)         | C36      | C37      | C38      | C39      | 0.1(6)         |
| C1       | C6       | C7       | N3       | 124.7(4)       | C36      | C41      | C42      | N8       | 132.4(3)       |
| C1       | C6       | C7       | C8       | 0.5(5)         | C36      | C41      | C42      | C43      | 7.1(5)         |

|    |    |     |     |           |     |     |     |     |           |
|----|----|-----|-----|-----------|-----|-----|-----|-----|-----------|
| C1 | C6 | C7  | C22 | -124.3(4) | C36 | C41 | C42 | C57 | -118.2(4) |
| C2 | C1 | C6  | C5  | -2.1(5)   | C37 | C36 | C41 | C40 | 0.4(6)    |
| C2 | C1 | C6  | C7  | 175.7(3)  | C37 | C36 | C41 | C42 | 176.8(3)  |
| C2 | C3 | C4  | C5  | -1.9(5)   | C37 | C38 | C39 | C40 | 0.3(6)    |
| C3 | N1 | C14 | C15 | -81.3(5)  | C38 | N6  | C49 | C50 | -71.9(6)  |
| C3 | N1 | C16 | C17 | 76.0(5)   | C38 | N6  | C51 | C52 | 75.3(5)   |
| C3 | C4 | C5  | C6  | 1.5(6)    | C40 | C41 | C42 | N8  | -51.4(5)  |
| C4 | C5 | C6  | C1  | 0.5(5)    | C40 | C41 | C42 | C43 | -176.7(4) |
| C4 | C5 | C6  | C7  | -177.3(3) | C40 | C41 | C42 | C57 | 58.1(5)   |
| C5 | C6 | C7  | N3  | -57.6(4)  | C41 | C36 | C37 | C38 | -0.5(6)   |
| C5 | C6 | C7  | C8  | 178.2(3)  | C41 | C40 | C39 | C38 | -0.4(7)   |
| C5 | C6 | C7  | C22 | 53.4(4)   | C41 | C42 | C43 | C44 | 174.4(3)  |
| C6 | C1 | C2  | C3  | 1.7(6)    | C41 | C42 | C43 | C48 | -10.0(5)  |

**Table S6 (b) Torsion Angles for RHBIT**

| A   | B   | C   | D   | Angle/°   | A   | B   | C   | D   | Angle/°   |
|-----|-----|-----|-----|-----------|-----|-----|-----|-----|-----------|
| C6  | C7  | C8  | C9  | -175.5(3) | C41 | C42 | C57 | C58 | 58.9(5)   |
| C6  | C7  | C8  | C13 | 2.5(5)    | C41 | C42 | C57 | C62 | -120.4(3) |
| C6  | C7  | C22 | C23 | 63.4(5)   | C42 | N8  | C63 | O6  | -179.3(3) |
| C6  | C7  | C22 | C27 | -115.2(3) | C42 | N8  | C63 | C62 | -1.3(4)   |
| C7  | N3  | C28 | O2  | 179.7(3)  | C42 | N8  | C64 | S2  | -36.8(5)  |
| C7  | N3  | C28 | C27 | 1.6(4)    | C42 | N8  | C64 | C65 | 141.9(4)  |
| C7  | N3  | C29 | S1  | 29.9(5)   | C42 | C43 | C44 | C45 | 173.5(4)  |
| C7  | N3  | C29 | C30 | -148.6(4) | C42 | C43 | C48 | O5  | 6.8(5)    |
| C7  | C8  | C9  | C10 | 178.0(4)  | C42 | C43 | C48 | C47 | -171.9(4) |
| C7  | C8  | C13 | O1  | -2.1(5)   | C42 | C57 | C58 | C59 | 179.9(4)  |
| C7  | C8  | C13 | C12 | -179.4(4) | C42 | C57 | C62 | C61 | -178.6(4) |
| C7  | C22 | C23 | C24 | -178.1(4) | C42 | C57 | C62 | C63 | 3.3(4)    |
| C7  | C22 | C27 | C26 | 177.3(3)  | C43 | C42 | C57 | C58 | -65.8(5)  |
| C7  | C22 | C27 | C28 | -2.8(4)   | C43 | C42 | C57 | C62 | 114.8(4)  |
| C8  | C7  | C22 | C23 | -60.6(5)  | C43 | C44 | C45 | C46 | -1.8(6)   |
| C8  | C7  | C22 | C27 | 120.7(3)  | C44 | C43 | C48 | O5  | -177.3(3) |
| C8  | C9  | C10 | C11 | 0.8(7)    | C44 | C43 | C48 | C47 | 3.9(6)    |
| C9  | C8  | C13 | O1  | 176.0(4)  | C44 | C45 | C46 | N7  | -173.9(4) |
| C9  | C8  | C13 | C12 | -1.3(5)   | C44 | C45 | C46 | C47 | 4.4(6)    |
| C9  | C10 | C11 | N2  | -179.5(4) | C45 | C46 | C47 | C48 | -2.9(6)   |
| C9  | C10 | C11 | C12 | -0.2(6)   | C46 | N7  | C53 | C54 | 84.0(6)   |
| C10 | C11 | C12 | C13 | -1.2(6)   | C46 | N7  | C55 | C56 | 92.0(5)   |
| C11 | N2  | C18 | C19 | -80.7(5)  | C46 | C47 | C48 | O5  | 179.8(4)  |
| C11 | N2  | C20 | C21 | -78.0(6)  | C46 | C47 | C48 | C43 | -1.3(6)   |
| C11 | C12 | C13 | O1  | -175.5(3) | C48 | O5  | C36 | C37 | 178.6(3)  |
| C11 | C12 | C13 | C8  | 2.0(6)    | C48 | O5  | C36 | C41 | -3.8(5)   |
| C13 | O1  | C1  | C2  | -175.1(3) | C48 | C43 | C44 | C45 | -2.3(6)   |
| C13 | O1  | C1  | C6  | 4.8(5)    | C49 | N6  | C38 | C37 | 169.3(4)  |
| C13 | C8  | C9  | C10 | -0.1(6)   | C49 | N6  | C38 | C39 | -11.5(6)  |
| C14 | N1  | C3  | C2  | 177.6(3)  | C49 | N6  | C51 | C52 | -90.4(5)  |
| C14 | N1  | C3  | C4  | -3.9(5)   | C51 | N6  | C38 | C37 | 3.8(6)    |

|     |     |     |     |           |     |     |     |     |           |
|-----|-----|-----|-----|-----------|-----|-----|-----|-----|-----------|
| C14 | N1  | C16 | C17 | -95.3(4)  | C51 | N6  | C38 | C39 | -176.9(4) |
| C16 | N1  | C3  | C2  | 6.7(5)    | C51 | N6  | C49 | C50 | 93.7(5)   |
| C16 | N1  | C3  | C4  | -174.8(4) | C53 | N7  | C46 | C45 | 1.9(7)    |
| C16 | N1  | C14 | C15 | 89.8(5)   | C53 | N7  | C46 | C47 | -176.4(4) |
| C18 | N2  | C11 | C10 | 0.0(7)    | C53 | N7  | C55 | C56 | -105.0(5) |
| C18 | N2  | C11 | C12 | -179.3(4) | C55 | N7  | C46 | C45 | 164.1(4)  |
| C18 | N2  | C20 | C21 | 98.3(5)   | C55 | N7  | C46 | C47 | -14.2(7)  |
| C20 | N2  | C11 | C10 | 176.1(4)  | C55 | N7  | C53 | C54 | -78.7(5)  |
| C20 | N2  | C11 | C12 | -3.2(7)   | C57 | C42 | C43 | C44 | -60.3(4)  |
| C20 | N2  | C18 | C19 | 103.1(5)  | C57 | C42 | C43 | C48 | 115.4(4)  |
| C22 | C7  | C8  | C9  | -50.9(5)  | C57 | C58 | C59 | C60 | -0.6(7)   |
| C22 | C7  | C8  | C13 | 127.1(4)  | C57 | C62 | C63 | O6  | 176.7(4)  |
| C22 | C23 | C24 | C25 | 0.8(7)    | C57 | C62 | C63 | N8  | -1.3(4)   |
| C22 | C27 | C28 | O2  | -177.3(4) | C58 | C57 | C62 | C61 | 2.0(6)    |
| C22 | C27 | C28 | N3  | 0.7(4)    | C58 | C57 | C62 | C63 | -176.1(4) |
| C23 | C22 | C27 | C26 | -1.4(6)   | C58 | C59 | C60 | C61 | 0.8(7)    |
| C23 | C22 | C27 | C28 | 178.5(3)  | C59 | C60 | C61 | C62 | 0.3(7)    |
| C23 | C24 | C25 | C26 | -1.1(7)   | C60 | C61 | C62 | C57 | -1.7(6)   |
| C24 | C25 | C26 | C27 | 0.1(7)    | C60 | C61 | C62 | C63 | 176.0(4)  |

**Table S6 (c) Torsion Angles for RHBIT**

| A   | B   | C   | D   | Angle/°   | A   | B   | C   | D   | Angle/°   |
|-----|-----|-----|-----|-----------|-----|-----|-----|-----|-----------|
| C25 | C26 | C27 | C22 | 1.1(6)    | C61 | C62 | C63 | O6  | -1.3(7)   |
| C25 | C26 | C27 | C28 | -178.8(4) | C61 | C62 | C63 | N8  | -179.3(4) |
| C26 | C27 | C28 | O2  | 2.6(7)    | C62 | C57 | C58 | C59 | -0.8(6)   |
| C26 | C27 | C28 | N3  | -179.4(4) | C63 | N8  | C42 | C41 | 120.6(3)  |
| C27 | C22 | C23 | C24 | 0.4(6)    | C63 | N8  | C42 | C43 | -115.0(3) |
| C28 | N3  | C7  | C6  | 115.0(3)  | C63 | N8  | C42 | C57 | 3.0(4)    |
| C28 | N3  | C7  | C8  | -121.0(3) | C63 | N8  | C64 | S2  | 137.8(3)  |
| C28 | N3  | C7  | C22 | -3.1(4)   | C63 | N8  | C64 | C65 | -43.5(6)  |
| C28 | N3  | C29 | S1  | -140.5(3) | C64 | S2  | N9  | C70 | 0.7(3)    |
| C28 | N3  | C29 | C30 | 41.1(6)   | C64 | N8  | C42 | C41 | -64.3(4)  |
| C29 | S1  | N4  | C35 | -1.7(3)   | C64 | N8  | C42 | C43 | 60.1(4)   |
| C29 | N3  | C7  | C6  | -56.3(4)  | C64 | N8  | C42 | C57 | 178.1(3)  |
| C29 | N3  | C7  | C8  | 67.6(4)   | C64 | N8  | C63 | O6  | 5.8(6)    |
| C29 | N3  | C7  | C22 | -174.4(3) | C64 | N8  | C63 | C62 | -176.2(3) |
| C29 | N3  | C28 | O2  | -9.2(6)   | C64 | C65 | C66 | C67 | -178.2(4) |
| C29 | N3  | C28 | C27 | 172.8(3)  | C64 | C65 | C70 | N9  | 1.0(5)    |
| C29 | C30 | C31 | C32 | 178.4(4)  | C64 | C65 | C70 | C69 | 179.4(4)  |
| C29 | C30 | C35 | N4  | -1.2(5)   | C65 | C66 | C67 | N10 | -179.5(3) |
| C29 | C30 | C35 | C34 | -178.0(4) | C65 | C66 | C67 | C68 | -0.2(6)   |
| C30 | C31 | C32 | N5  | 178.8(3)  | C66 | C65 | C70 | N9  | -177.3(4) |
| C30 | C31 | C32 | C33 | -1.2(6)   | C66 | C65 | C70 | C69 | 1.1(6)    |
| C31 | C30 | C35 | N4  | 177.3(4)  | C66 | C67 | C68 | C69 | -0.1(7)   |
| C31 | C30 | C35 | C34 | 0.4(6)    | C67 | C68 | C69 | C70 | 0.9(7)    |
| C31 | C32 | C33 | C34 | 1.3(7)    | C68 | C69 | C70 | N9  | 176.9(4)  |
| C32 | C33 | C34 | C35 | -0.5(7)   | C68 | C69 | C70 | C65 | -1.4(6)   |
| C33 | C34 | C35 | N4  | -176.9(4) | C70 | C65 | C66 | C67 | -0.3(6)   |



|     |     |     |     |         |     |     |     |     |           |
|-----|-----|-----|-----|---------|-----|-----|-----|-----|-----------|
| C33 | C34 | C35 | C30 | -0.3(7) | C39 | C40 | C41 | C36 | 0.1(6)    |
| C35 | C30 | C31 | C32 | 0.3(5)  | C39 | C40 | C41 | C42 | -176.4(4) |

**Table S7 (a) Hydrogen Atom Coordinates ( $\text{\AA}\times 10^4$ ) and Isotropic Displacement Parameters ( $\text{\AA}^2\times 10^3$ ) for RHBIT**

| Atom | x    | y    | z     | U(eq) |
|------|------|------|-------|-------|
| H2   | 2679 | 4283 | 11879 | 33    |
| H4   | 2712 | 3572 | 9012  | 34    |
| H5   | 2906 | 4438 | 8334  | 32    |
| H9   | 3031 | 6568 | 9053  | 37    |
| H10  | 2994 | 7261 | 10275 | 39    |
| H12  | 3111 | 6088 | 12588 | 34    |
| H14A | 2650 | 2491 | 10774 | 41    |
| H14B | 2985 | 2841 | 9850  | 41    |
| H15A | 656  | 3015 | 8881  | 67    |

**Table S7 (b) Hydrogen Atom Coordinates ( $\text{\AA}\times 10^4$ ) and Isotropic Displacement Parameters ( $\text{\AA}^2\times 10^3$ ) for RHBIT**

| Atom | x    | y    | z     | Ueq |
|------|------|------|-------|-----|
| H15B | 316  | 2670 | 9810  | 67  |
| H15C | 935  | 2362 | 9004  | 67  |
| H16A | 2947 | 3509 | 12559 | 41  |
| H16B | 2507 | 2877 | 12274 | 41  |
| H17A | 238  | 3150 | 11409 | 79  |
| H17B | 673  | 3785 | 11677 | 79  |
| H17C | 850  | 3362 | 12684 | 79  |
| H18A | 2601 | 7965 | 12502 | 45  |
| H18B | 2339 | 7796 | 11230 | 45  |
| H19A | 4748 | 7742 | 11741 | 71  |
| H19B | 4925 | 7985 | 12951 | 71  |
| H19C | 4235 | 8356 | 11847 | 71  |
| H20A | 3257 | 7351 | 13921 | 53  |
| H20B | 3588 | 6718 | 13755 | 53  |
| H21A | 1219 | 6550 | 12797 | 80  |
| H21B | 923  | 7176 | 13047 | 80  |
| H21C | 1559 | 6749 | 14065 | 80  |
| H23  | 156  | 5527 | 8425  | 42  |

|      |       |      |       |     |
|------|-------|------|-------|-----|
| H24  | -1303 | 5648 | 6552  | 53  |
| H25  | -477  | 5714 | 5113  | 54  |
| H26  | 1855  | 5689 | 5520  | 42  |
| H31  | 6285  | 6217 | 8312  | 33  |
| H33  | 10305 | 6162 | 10273 | 44  |
| H34  | 9954  | 5488 | 11424 | 46  |
| H37  | 6085  | 3857 | 2109  | 36  |
| H40  | 5477  | 3442 | 5432  | 40  |
| H44  | 5886  | 5578 | 6138  | 35  |
| H45  | 6301  | 6425 | 5496  | 36  |
| H47  | 6762  | 5652 | 2844  | 39  |
| H49A | 5468  | 1984 | 1902  | 59  |
| H49B | 5035  | 2161 | 2922  | 59  |
| H50A | 7699  | 1972 | 3018  | 110 |
| H50B | 6963  | 1675 | 3752  | 110 |
| H50C | 7445  | 2306 | 4000  | 110 |
| H51A | 5440  | 3264 | 893   | 44  |
| H51B | 5626  | 2620 | 701   | 44  |
| H52A | 7511  | 3154 | 716   | 83  |
| H52B | 7961  | 2687 | 1673  | 83  |
| H52C | 7818  | 3318 | 1998  | 83  |
| H53A | 6466  | 7145 | 4740  | 53  |
| H53B | 7059  | 7455 | 3919  | 53  |
| H54A | 9265  | 7157 | 5076  | 82  |

**Table S7 (c) Hydrogen Atom Coordinates ( $\text{\AA}\times 10^4$ ) and Isotropic Displacement Parameters ( $\text{\AA}^2\times 10^3$ ) for RHBIT**

| Atom | x     | y    | z    | $U_{eq}$ |
|------|-------|------|------|----------|
| H54B | 8652  | 6876 | 5913 | 82       |
| H54C | 8606  | 7535 | 5763 | 82       |
| H55A | 8390  | 6924 | 3076 | 62       |
| H55B | 8226  | 6263 | 2984 | 62       |
| H56A | 7191  | 6682 | 1234 | 90       |
| H56B | 6216  | 7018 | 1703 | 90       |
| H56C | 6103  | 6357 | 1591 | 90       |
| H58  | 8764  | 4379 | 6119 | 44       |
| H59  | 10231 | 4217 | 7978 | 59       |
| H60  | 9450  | 4185 | 9432 | 56       |
| H61  | 7110  | 4299 | 9072 | 47       |
| H66  | 2730  | 3757 | 6209 | 36       |
| H68  | -1301 | 3815 | 4252 | 46       |
| H69  | -971  | 4530 | 3181 | 44       |
| H39  | 5434  | 2734 | 4217 | 43       |

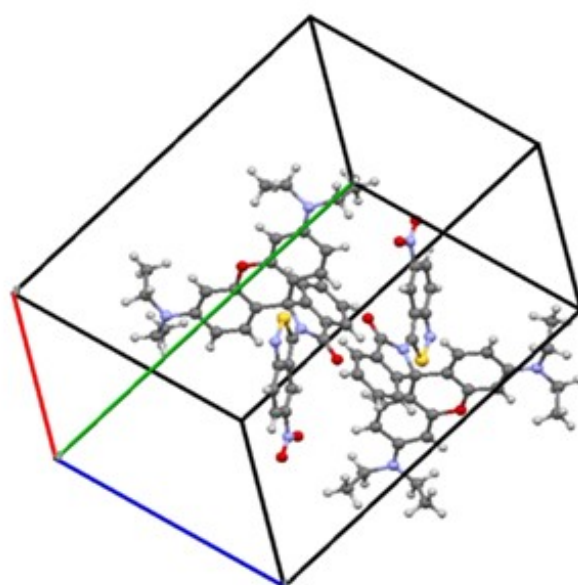

**(a)**

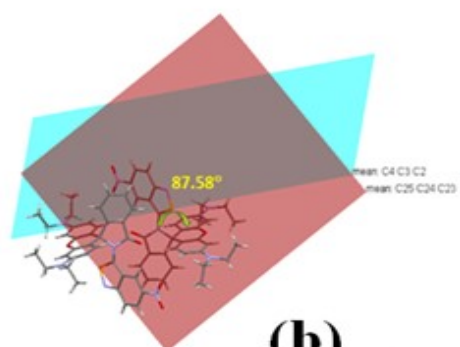

**(b)**

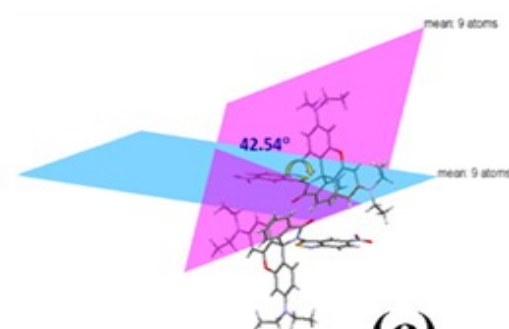

**(c)**

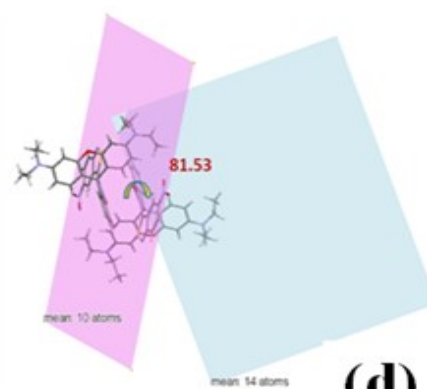

**(d)**

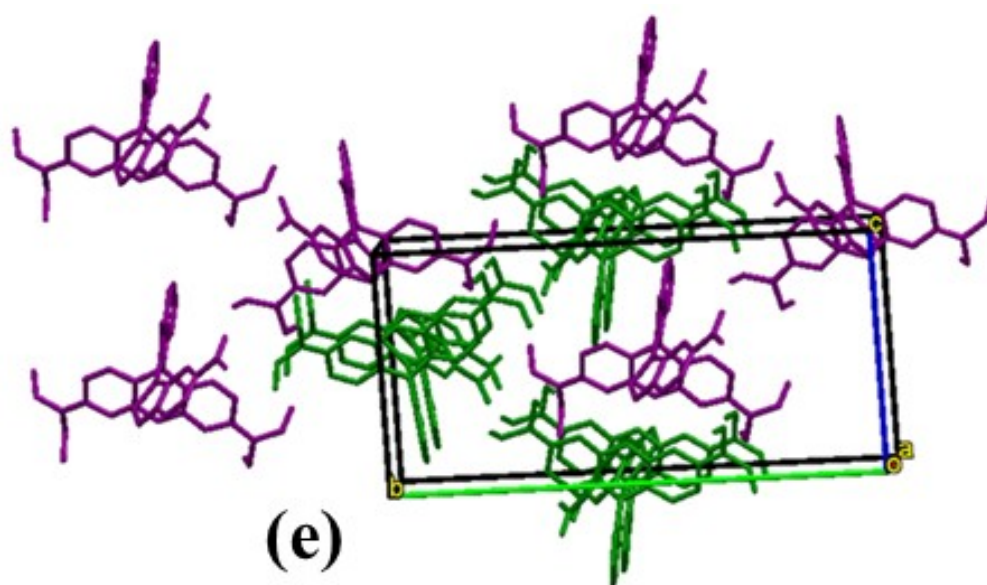

**(e)**

**Fig. S6.** (a) Asymmetric unit comprising two units of **RHBIT** arranged antiparallel to each other (b) angle between the xanthene ring and spiro lactam unit (c) angle between the spiro lactam ring and the ANB moiety (d) angle between the xanthene ring and ANB moiety (e) parallel arrangement of two units along the axis *oa*.

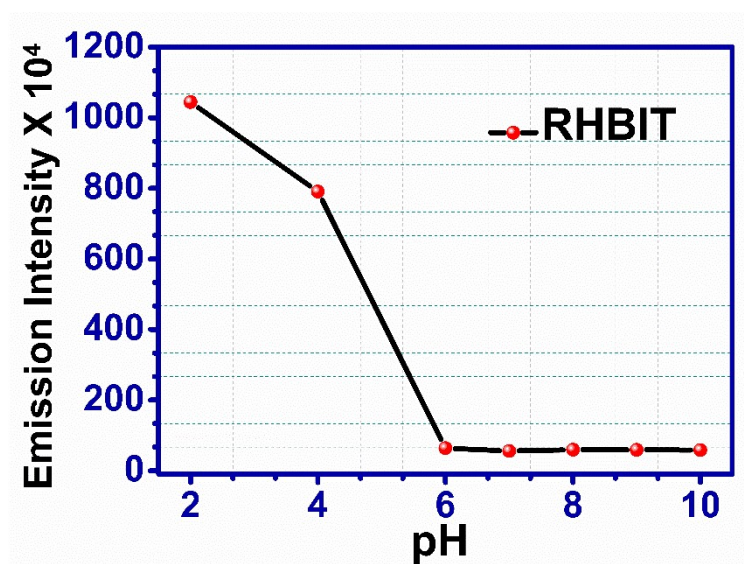

**Fig. S7** Shows the variation in fluorescence emission ( $\lambda_{\text{max}} \sim 575$  nm) intensity of **RHBIT** when excited at 520 nm at different pH conditions, emerging in the increased emission intensity at pH <6 (under acidic conditions); and cyclic form of **RHBIT** was relatively stable within pH 6-10.

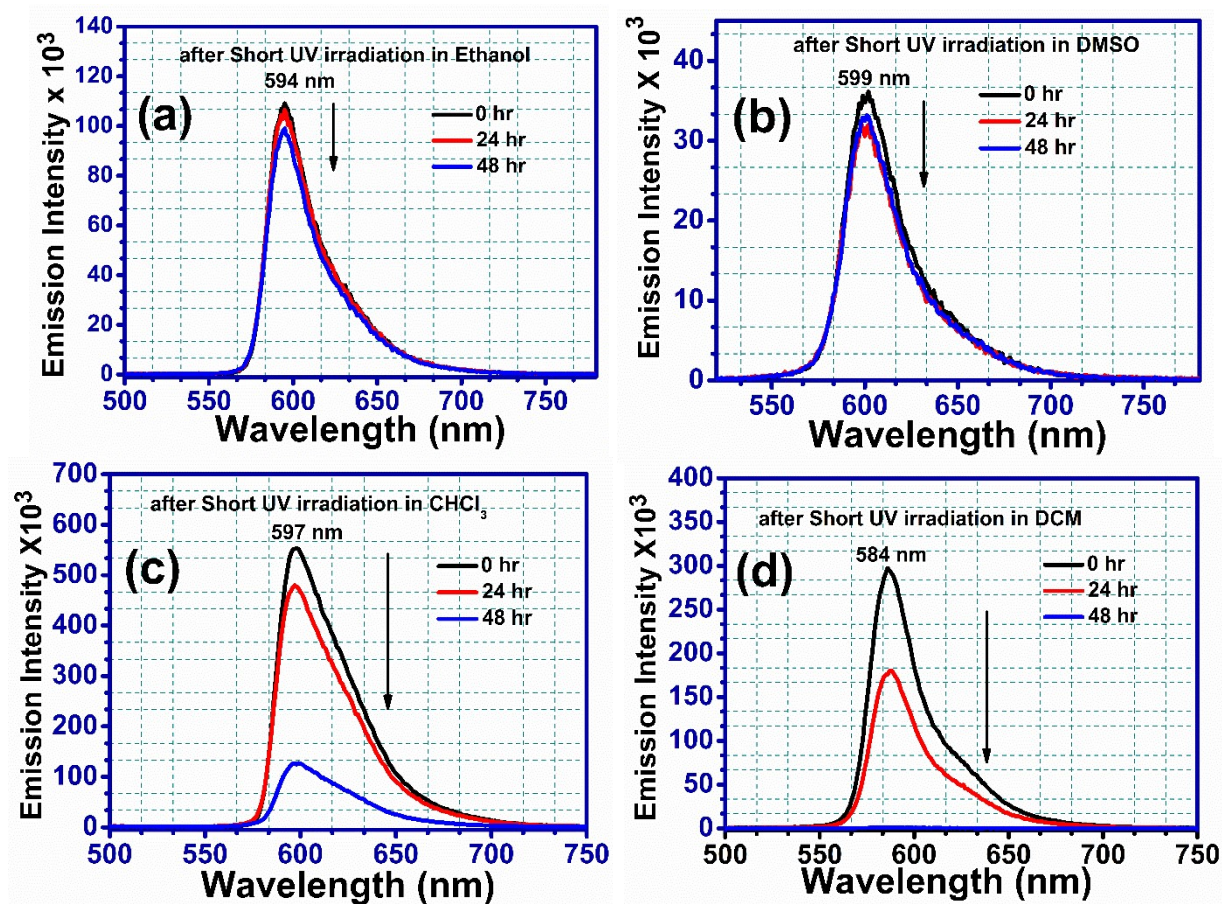

**Fig. S8** Change in the emission intensity of **RHBIT** in (a) EtOH, (b) DMSO, (c)  $\text{CHCl}_3$ , and (d) DCM after exposure to short UV light at different intervals of time; observed minimal decrease in intensity for ethanol and DMSO but a drastic decrease in case of  $\text{CHCl}_3$ , and DCM solvents predicting that **RHBIT** is reverted back to closed form after 48 hours of UV irradiation.

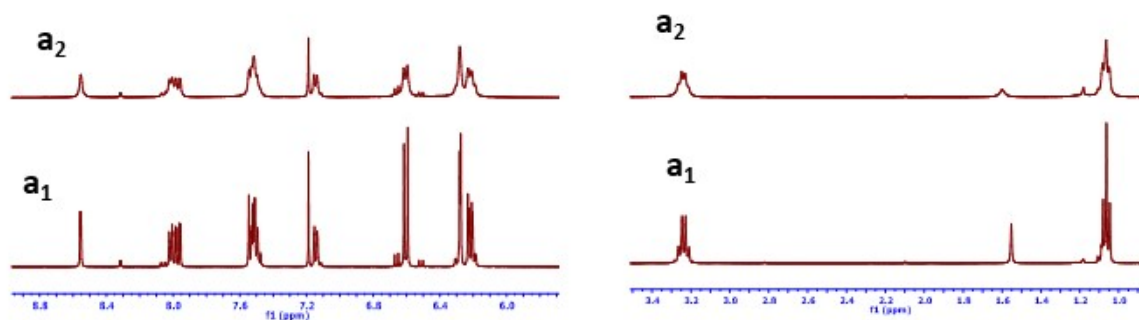

**Fig. S9**  $^1\text{H}$  NMR spectra of **RHBIT** before and after UV light (254 nm) irradiation over 10 min at RT in  $\text{CDCl}_3$ . **a**<sub>1</sub> and **a**<sub>2</sub> represents proton spectra of **RHBIT** before and after UV exposure respectively.

The response of the signals becomes broadened after UV irradiation and no new characteristic signal is found in the downfield region.

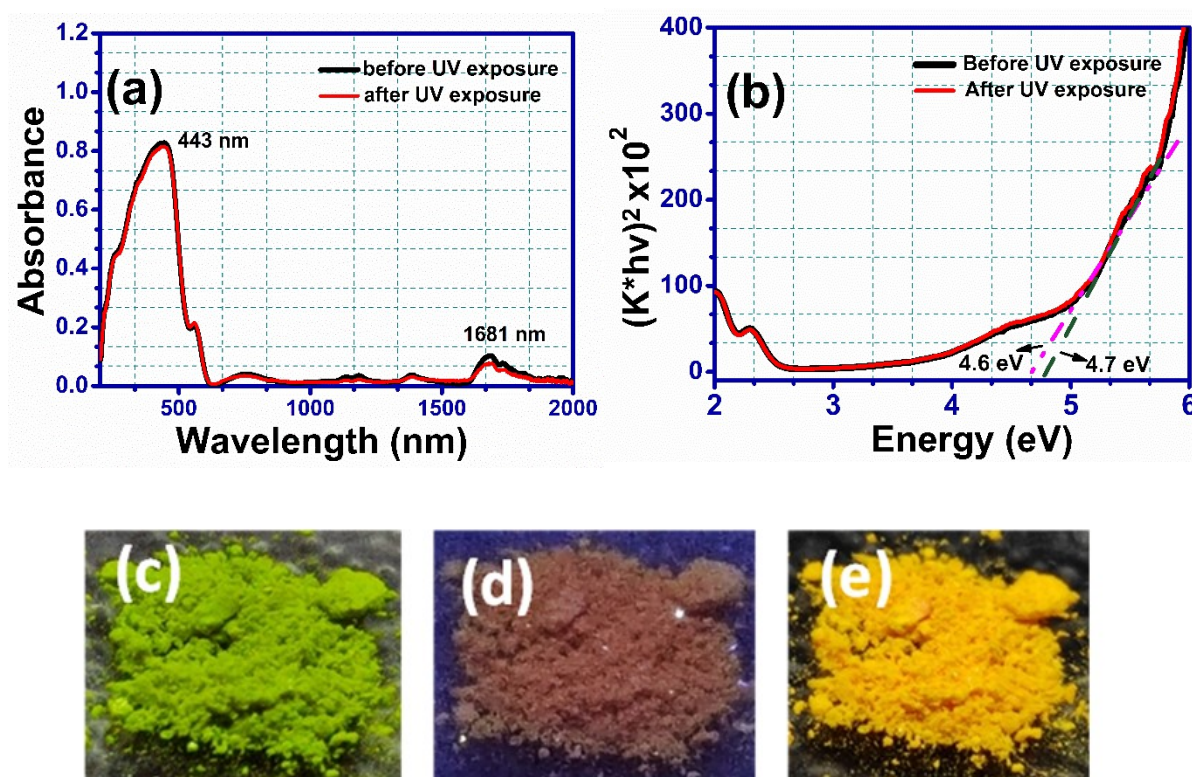

**Fig. S10** (a) absorption, (b) optical bandgap spectra of **RHBIT** in solid state before and after exposure to UV light with  $\lambda_{\text{max}}$  absorption at  $\sim 443$  nm and a faint absorption at 1681 nm indicating weak charge-transfer interaction. The optical bandgap of **RHBIT** obtained as  $\sim 4.7$  eV (before UV),  $\sim 4.6$  eV (after UV) through the Kubelka-Munk plot from the diffuse reflectance spectrum. (c), (d) & (e) displays the solid sample images under short UV, long UV and visible light.

#### Lifetime and Quantum yield calculation:

The average fluorescent lifetime, radiative ( $k_r$ ) and non-radiative ( $k_{nr}$ ) decay values of **RHBIT** in different solvents were calculated by using the following equations (S1&S2), where  $\tau$ ,  $\alpha_i$ ,  $\tau_i$ , are the average lifetime, individual component contribution, and lifetime of individual components respectively.<sup>1</sup> The exponential fitting of the decay profiles was determined by judging the chi-square ( $\chi^2$ ) values varied between 0.8-1.2.

$$\tau = \frac{\sum \alpha_i \tau_i^2}{\sum \alpha_i \tau_i} \quad (\text{S1})$$

$$k_r = \frac{\phi_f}{\langle \tau \rangle}, \quad k_{nr} = \frac{(1 - \phi_f)}{\langle \tau \rangle} \quad (\text{S2})$$

The relative quantum yield was measured with respect to quinine sulphate ( $\Phi_f = 0.54$ ) in 0.1M  $H_2SO_4$  and rhodamine B ( $\Phi_f = 0.97$ )<sup>2,3</sup> in ethanol as reference by using the formula (S3), where, error limit =  $\pm 5\%$ ;  $\Phi_f$  = quantum yield of the probe,  $\Phi_{Ref}$  = quantum yield of quinine sulphate / rhodamine b,  $A_{Sample}$  = Area under the curve of emission spectra of sample in different solvents before and after exposure to UV irradiation,  $A_{Ref}$  = Area under the curve of emission spectra of quinine sulphate / rhodamine b,  $Abs_{Sample}$  = Absorbance of the sample in different solvents,  $Abs_{Ref}$  = Absorbance of the standard reference quinine sulphate / rhodamine b,  $\eta$  = refractive index of the sample and reference in corresponding solvent.<sup>4</sup>

$$\Phi_f = \Phi_{Ref} \times (A_{Sample}/A_{Ref}) \times (Abs_{Ref}/Abs_{Sample}) \times (\eta_{Sample}^2/\eta_{Ref}^2) \quad (S3)$$

**Table S8** Lifetime decay, quantum yield, radiative and non-radiative decay values of probe **RHBIT** before (B) and after exposure (A) to UV irradiation.

| RHBIT<br>in<br>different<br>solvents | $\tau_1$ (ns) |      | $\tau_2$ (ns) |      | $\alpha_1$ (%) |      | $\alpha_2$ (%) |      | Average<br>lifetime<br>< $\tau$ > (ns) |      | $\Phi_f$ |       | $k_r$ ( $s^{-1}$ ) $\times 10^9$ |       | $K_{nr}$ ( $s^{-1}$ ) $\times 10^9$ |       |
|--------------------------------------|---------------|------|---------------|------|----------------|------|----------------|------|----------------------------------------|------|----------|-------|----------------------------------|-------|-------------------------------------|-------|
|                                      | B             | A    | B             | A    | B              | A    | B              | A    | B                                      | A    | B        | A     | B                                | A     | B                                   | A     |
| MeOH                                 | 0.15          | 0.23 | 0.96          | 0.95 | 0.48           | 0.37 | 0.52           | 0.63 | 0.85                                   | 0.86 | 0.01     | 0.02  | 0.01                             | 0.02  | 1.16                                | 1.14  |
| EtOH                                 | 0.32          | 0.31 | 1.41          | 1.37 | 0.56           | 0.59 | 0.44           | 0.41 | 1.16                                   | 1.11 | 0.30     | 0.33  | 0.25                             | 0.29  | 0.60                                | 0.60  |
| n-PrOH                               | 0.35          | 0.47 | 0.95          | 0.99 | 0.47           | 0.52 | 0.53           | 0.48 | 0.80                                   | 0.82 | 0.05     | 0.08  | 0.06                             | 0.09  | 1.18                                | 1.12  |
| n-BuOH                               | 0.39          | 0.51 | 0.93          | 0.98 | 0.52           | 0.61 | 0.48           | 0.39 | 0.76                                   | 0.77 | 0.006    | 0.01  | 0.007                            | 0.01  | 1.30                                | 1.28  |
| DMF                                  | 0.27          | 0.30 | 0.93          | 0.94 | 0.45           | 0.45 | 0.55           | 0.55 | 0.80                                   | 0.80 | 0.003    | 0.004 | 0.003                            | 0.005 | 1.24                                | 1.24  |
| DMSO                                 | 0.45          | 0.39 | 0.96          | 1.40 | 0.53           | 0.59 | 0.47           | 0.41 | 0.78                                   | 1.11 | 0.004    | 0.23  | 0.004                            | 0.20  | 1.27                                | 0.69  |
| ACN                                  | 0.15          | 0.13 | 0.90          | 0.90 | 0.37           | 0.37 | 0.63           | 0.63 | 0.83                                   | 0.84 | 0.002    | 0.003 | 0.003                            | 0.003 | 1.20                                | 1.18  |
| 1,4-Dioxane                          | 0.28          | 0.28 | 0.89          | 0.90 | 0.48           | 0.48 | 0.52           | 0.52 | 0.75                                   | 0.76 | 0.07     | 0.08  | 0.08                             | 0.09  | 1.24                                | 1.21  |
| EtOAc                                | 0.16          | 0.15 | 0.90          | 0.91 | 0.44           | 0.44 | 0.56           | 0.56 | 0.81                                   | 0.82 | 0.01     | 0.01  | 0.01                             | 0.01  | 1.22                                | 1.20  |
| THF                                  | 0.19          | 0.20 | 0.98          | 1.01 | 0.45           | 0.45 | 0.55           | 0.55 | 0.87                                   | 0.89 | 0.05     | 0.02  | 0.06                             | 0.01  | 1.08                                | 1.10  |
| CHCl <sub>3</sub>                    | 0.14          | 0.26 | 1.36          | 2.6  | 0.45           | 0.40 | 0.55           | 0.60 | 1.26                                   | 2.47 | 0.02     | 0.66  | 0.01                             | 0.26  | 0.78                                | 0.13  |
| DCM                                  | 0.14          | 0.19 | 1.35          | 3.5  | 0.37           | 0.35 | 0.63           | 0.65 | 1.28                                   | 3.41 | 0.004    | 0.99  | 0.003                            | 0.29  | 0.77                                | 0.002 |

#### References:

1. Lakowicz, J. R. (Ed.), *Principles of fluorescence spectroscopy*, Boston, MA: springer US, 2006.
2. Z. Yang, M. She, B. Yin, J. Cui, Y. Zhang, W. Sun, J. Li and Z. shi, *J. Org. Chem.*, 2012, **77**, 1143-1147.
3. H. Battula, S. Muduli, S. Priyanka Bandi, S. Kapoor, S. Mishra, H. Aggarwal, V. Vamsi Krishna Venuganti and S. Jayanty, *J. Photochem. Photobiol. A Chem.*, 2022, **426**, 113748-113766.
4. J.N. Demas and G.A. Crosby, *J. Phys. Chem.*, 1971, **75**, 991-1024.

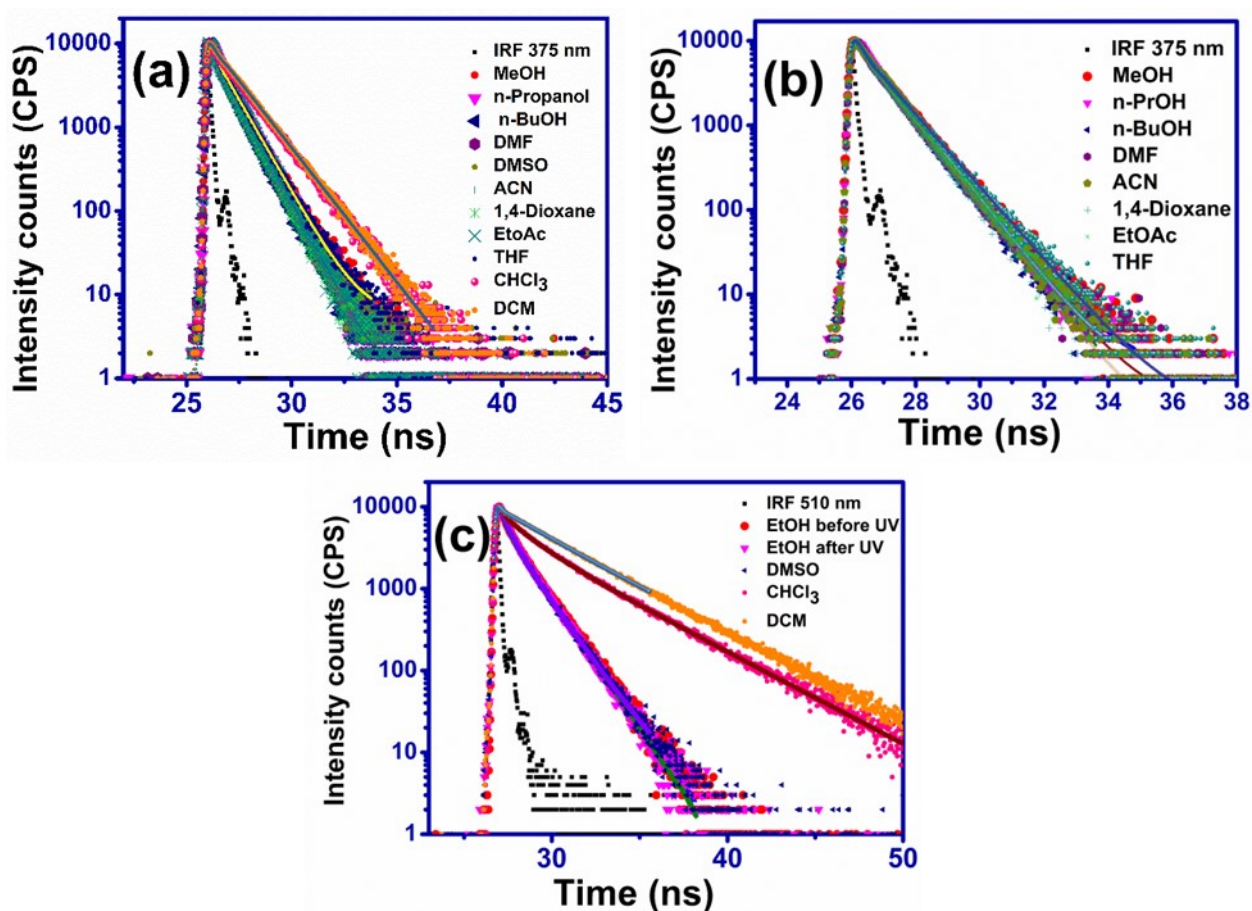

**Fig. S11** Time-resolved fluorescence decay curves of **RHBIT** (Intensity vs time in nanoseconds) in different solvents **(a)** before UV irradiation (IRF 375 nm), **(b)** after UV irradiation (IRF 375 nm) **(c)** after UV irradiation in ethanol (before and after), DMSO, CHCl<sub>3</sub> and DCM (IRF 510 nm). The average fluorescence lifetime after UV irradiation at 254 nm shows longer values in DMSO, CHCl<sub>3</sub>, and DCM confirming the ring-open mechanism of **RHBIT**.



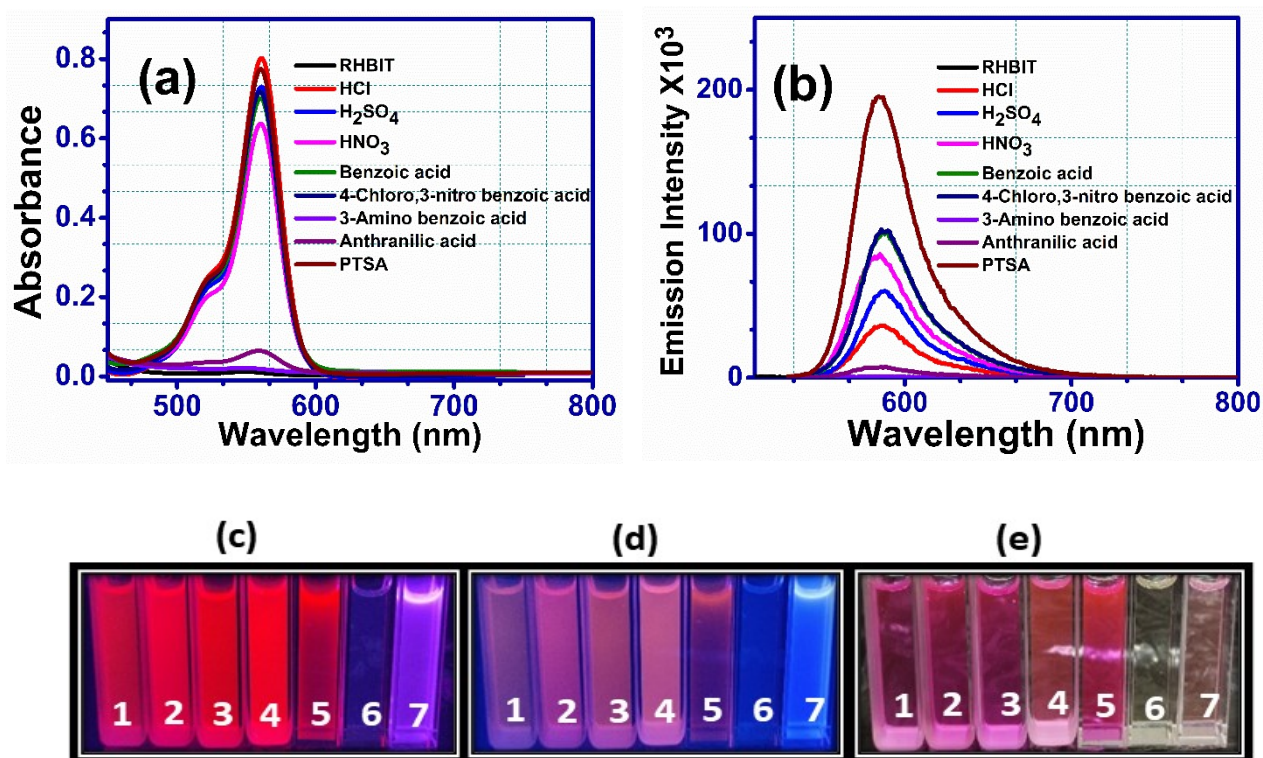

**Fig. S12** (a) absorption and (b) emission spectra of **RHBIT** with different acids excited at 520 nm ( $\lambda_{\text{abs}} \sim 560$  nm,  $\lambda_{\text{em}} \sim 584$  nm) exhibiting a 150-fold increase in emission intensity after the addition of PTSA to **RHBIT** and photographic images of **RHBIT** sensing different acids **1**, HCl; **2**, H<sub>2</sub>SO<sub>4</sub>; **3**, HNO<sub>3</sub>; **4**, Benzoic acid; **5**, 4-chloro,3-nitro Benzoic acid; **6**, 3-amino Benzoic acid; **7**, Anthranilic acid under (c) 254 nm short UV, (d) 365 nm long UV, (e) visible light.

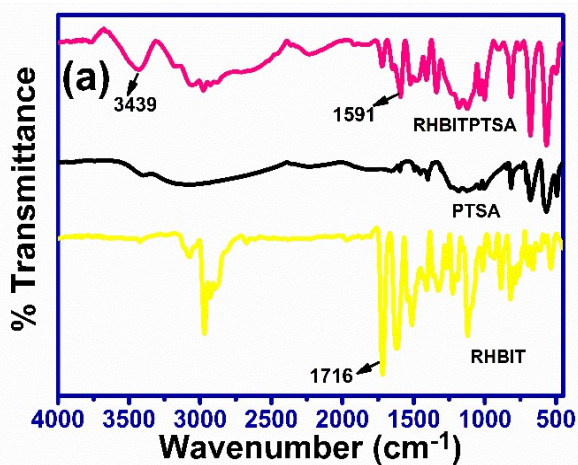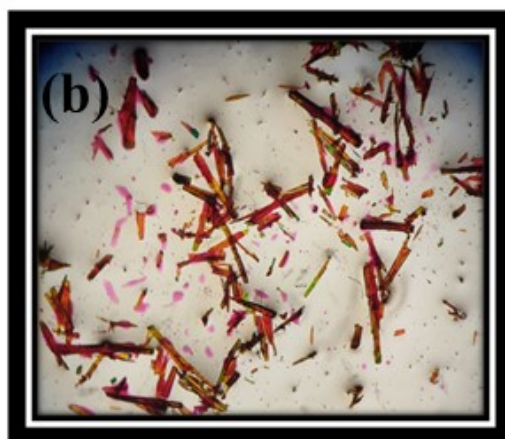

**Fig. S13** (a) FT-IR spectra of **RHBIT** (yellow), PTSA (black), and RHBIT-PTSA (pink) showing marked significant changes of the -C=O group (converting from cyclic lactam to open chain amide) due to proton transfer from PTSA, (b) crystals of RHBIT-PTSA with brown-pink color on their surface (cyclic form) and supernatant solution was pink in color.

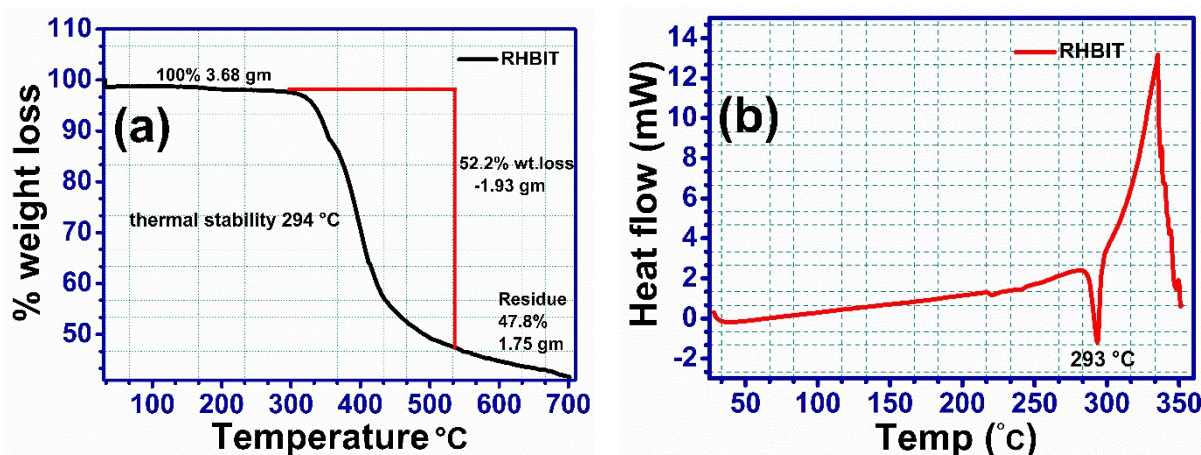

**Fig. S14** Thermogram obtained from (a) TGA and (b) DSC analysis for **RHBIT**, showcasing the thermal stability of **RHBIT** at 293 °C.

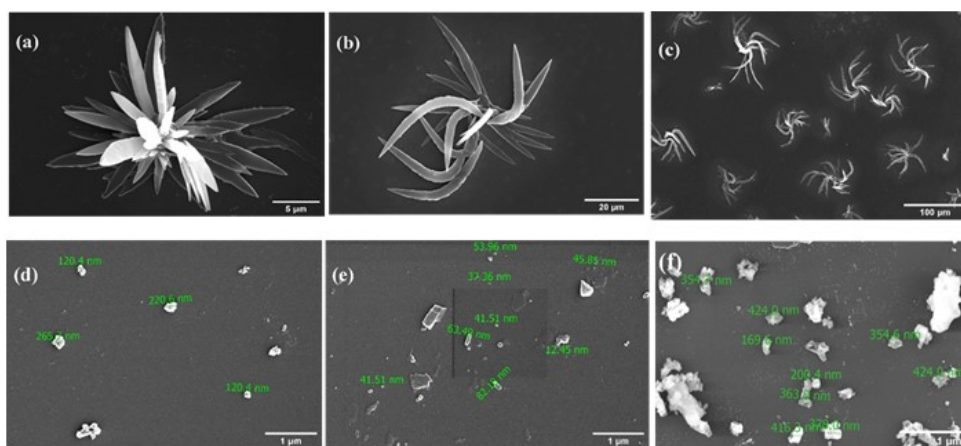

**Fig. S15** SEM images of drop cast films of **RHBIT** in various solvents (a), (b), (c) in acetonitrile at 5, 20, 100 μm magnification present bent petal-like structures; (d) *i*-propanol (e) *n*-butanol, (f) DMF at 1 μm magnification intimates aggregates.
